# Supplementary material for: The chromosome-scale reference genome of black pepper provides insight into piperine biosynthesis
Source: PubMed Central journal article supplement (PMC6795880; doi:10.1038/s41467-019-12607-6), 2019-10-16
Supplement: 41467_2019_12607_MOESM1_ESM.pdf [file 41467_2019_12607_MOESM1_ESM.pdf]

**The chromosome-scale reference genome of black pepper provides  
insight into piperine biosynthesis**

Hu *et al.*

## Supplementary Note 1

### Sample collection and DNA extraction

'Reyin1', one of the black pepper cultispecies derived from elite cultivar 'Lampung Daun Kecil' of Asia, which accumulates piperine in berry and is grown in the Flavor Beverage Institute, Chinese Academy of Tropical Agriculture Science, Hainan, was chosen for the sequencing and assembly of the black pepper reference genome. The fresh leaf tissues were collected from a single living plant into the gaseous phase of liquid nitrogen (-196 °C) and then stored at -80 °C. For Hi-C and BioNano optical map sequencing, the fresh leaf was used for experimental treatments.

### Assessment of the genomic size

The genome size and heterozygosity were evaluated by k-mer (k=17) distribution analysis with Jellyfish<sup>1</sup> and GCE<sup>2</sup> using 350 bp Illumina paired-end reads (102.8 Gb). Notably, our k-mer (k=17) distribution displayed two main distinct peaks (left peak: heterozygous regions and right peak: homozygous regions) (Supplementary Figure 1). Based on two hypotheses, all the k-mer distributions obtained from sequenced reads traverse the entire genome and the frequencies of a k-mer along the sequence depth gradient follow a Poisson distribution, the genome size (G) is defined as  $G = \text{k-mer number} / \text{k-mer depth}$ , where the k-mer number is the total number of k-mers, and k-mer depth is the frequency occurring more frequently than other frequencies. The 17-kmer analysis captured a k-mer number of 78,519,660,276 and main peak depth of 101 in a plot of the frequency distribution of k-mer numbers, suggesting that the *P. nigrum*

genome is approximately 761.74 Mb. The secondary peak that has just half of the average sequencing depth of the primary peak reveals high heterozygosity (1.33%), and the percentage of k-mer numbers after the homozygous peak at 1.8 of the total number of k-mers shows a repetitive sequence ratio of 59.54%.

### **Genome assembly**

Given the challenges of high heterozygosity (1.33%) and repetitive sequences (59.54%) (Supplementary Table 1 and Supplementary Figure 1), we adopted a comprehensive assembly strategy in this project (Supplementary Figure 2). The PacBio long reads span repeat-rich and heterozygous genomic regions, to effectively overcome the challenges in plant genome assembly. Chromium 10X data was also utilized to support scaffold validation and allow further elongation of the phased scaffolds (Piper\_nigrum\_v1).

We performed scaffolding of Piper\_nigrum\_v1 assembly using the BioNano optical maps sequence. DLS labelled DNA was loaded into a nanochannel array of a Saphyr Chip (BioNano Genomics) and imaged using the Saphyr system and associated software (BioNano Genomics). Notably, 3,433,888 BioNano molecules with a molecule N50 0.176 Mb for molecules above 20 Kb and 0.266 Mb for molecules above 150 Kb were obtained with an average label density of 14.21/100 Kb for molecules above 150 Kb. The map rate was 50.6% for molecules above 150 Kb. The effective coverage was 128X.

The BioNano data were filtered and *de novo* assembly was performed using BioNano Solve v3.2.1 software. The assembly type performed was the “non-haplotype” with “no extend split” and “no cut segdups” (optArguments\_nonhaplotype\_noES\_noCut\_DLE1\_saphyr.xml). A more stringent strategy was used according to the manufacturer’s guidelines to overcome the higher heterozygosity and polyploidy in the black pepper genome. A total of 350,823 filtered DLE-1 molecules with an N50 of 0.288 Mb (theoretical coverage of the reference 74x) produced 547 maps with an N50 length of 3.8 Mb and a total length of 1,304 Mb (coverage = 23x).

For the DLE-1 scaffolding, HybridScaffold config file hybridScaffold\_DLE1\_config.xml was used as default settings. The autoNoise1.errbin file from *de novo* assembly of BioNano molecule that without reference was also used as an auto-noise. Despite undergoing filtering and under a more stringent strategy, many conflict sites remained between the PacBio assembly sequence and BioNano optical maps *de novo* assembly because of high heterozygosity and repetitive sequences in the black pepper genome. We reduced the redundancy in the PacBio long read assembly using Falcon, but not in BioNano Solve arithmetic at present. Therefore, we selected to cut the BioNano contigs and retain PacBio assembly at the conflict sites (the software Hybrid-scaffold parameter of ‘-B 2 -N 1’). Finally, we visualized the genome map using BioNano Access (<https://bionanogenomics.com/support-page/bionano-access-software/>) and manually examined the conflict sites together with mapping Illumina paired-end reads and PacBio long reads to conflict regions. Then, the genomeCoverageBed<sup>3,4</sup> command with the “-d”

parameter was used to define the coverage of each base (including the bases that are covered by no reads), and coverage files were employed to verify whether the connections were authentic and reliable. If the cut was inappropriate, we edited the assignAlignType/cut\_conflicts/conflict\_cut\_status.txt file, and reran the hybrid scaffold pipeline using the “-M” option along with the newly edited status file. The resulting DLS hybrid assembly had an N50 of 7.8 Mb for a total length of 837 Mb and consisted of 201 scaffolds (Piper\_nigrum\_v2). We then conducted additional scaffolding using Hi-C data, followed by gap filling using corrected PacBio long reads and consensus polishing using Illumina paired-end reads (Piper\_nigrum\_v3).

### **SNP calling for heterozygosity**

BWA-MEM<sup>5</sup> was also used to remap the final assembled Piper\_nigrum\_v3 genome with Illumina paired-end reads to calculate the observed heterozygosity. SAMtools<sup>6</sup> sorted aligned results were marked and duplicates were removed using Picardtools, followed by SNP calling and filtering (QUAL > 20) using GATK<sup>7</sup>. The heterozygosity of each scaffold was calculated using GWASTools<sup>8</sup> with the hetByScanChrom function.

## **Supplementary Note 2**

### **Annotation of repeat DNA sequences**

For the LTR-RT annotation, Profile HMM files were selected from Pfam<sup>9</sup> (<http://pfam.xfam.org/search#tabview=tab2>) using the search terms “retrotransposon”,

“env transposon”, “reverse transcriptase”, “retroelements” and “gag transposon”. The resulting list in matching Pfam families was subsequently checked via click to enter: Species → Tree. Only the results belonging to Viridiplantae were added to the final set (Supplementary Table 6). When using LTRdigest, this set is organized as a directory containing the downloaded pHMM files, which represent an argument for using the “-hmms” parameter.

For repeat annotation, we first removed unknown sequences from non-redundant sequences using RepeatClassifier, resulting in identified and unknown sequences. The unknown sequences were searched with BLASTX against a transposase database with “-evalue 1e-10”. Then, the hits were combined with identified sequences into ModelerID.lib and other sequences were classified into ModelerUnknown.lib. Gene fragments were excluded from these two files using ProtExcluder (<http://www.hrt.msu.edu/uploads/535/78637/ProtExcluder1.2.tar.gz>) by searching a plant protein database (customized python script), which contains sequences from SwissProt plant proteins ([ftp://ftp.uniprot.org/pub/databases/uniprot/current\\_release/knowledgebase/taxonomic\\_divisions/uniprot\\_sprot\\_plants.dat.gz](ftp://ftp.uniprot.org/pub/databases/uniprot/current_release/knowledgebase/taxonomic_divisions/uniprot_sprot_plants.dat.gz), 2018) and NCBI Refseq plants (using Entrez Direct: <https://www.ncbi.nlm.nih.gov/books/NBK179288/>). Protein sequences were also searched against the NCBI EST database (TBLASTN,  $e=10^{-5}$ ), and only sequences with a match were retained. Second, the remaining sequences were searched against the transposase database (BLASTP  $e=10^{-5}$ ) mentioned above, and sequences with matches were excluded. Finally, the sequences were combined with KnownRepeats

(ModelerID.libnoProtFinal) and the ModelerUnknown (ModelerUnknown.libnoProtFinal) library into a *de novo* repeat library, which was ranRepeatMasker on the assembled genome with -xsmall parameter.

### **Comparison of transposable elements**

The repeat family identification approach for black pepper was used to exquisitely annotate transposable elements (TEs) of species employed in the phylogenomics analysis (see below). The percentage of TEs in black pepper (~ 54.01%) was higher than in the other magnoliids (*Liriodendron chinense* (~ 44.59%) and *Cinnamomum kanehirae* (~ 33.41%)), *Amborella trichopoda*, *Selaginella moellendorffii* and nearly equivalent to that in *P. patens*. Among the retrotransposons (Class I), LTR retrotransposons were more prevalent than NonLTR retrotransposons and were the most dominant type of repeats in all species. A comparison with *Arabidopsis thaliana* indicated higher proportions of LTR retrotransposons in magnoliids (Supplementary Table 8). In addition, LTR/Gypsy members displayed a greater percentage than that of members of the LTR/Copia superfamilies, except in *Dendrobium officinale* (LTR/Gypsy: 19.95% and LTR/Copia: 45.22%) and *Nelumbo nucifera* (LTR/Gypsy: 35.89% and LTR/Copia: 47.81%). NonLTR retrotransposons are less prevalent in magnoliids than they are in *Amborella trichopoda*. Compared to monocots and eudicots, the LTR/Gypsy families of repeats appear to have expanded in magnoliids and lower plants. Conversely, LTR/Copia repeats appear to have contracted in lower plants (Supplementary Table 9). Large differences in the Gypsy-to-Copia ratio were observed among the species, with the largest differences of ~15.5 and 13.9 observed in lower plants, followed by smaller differences in

magnoliids (~3.7 to ~1.5) and angiosperms (~9.6 to ~0.4) (Supplementary Table 9). The proportion of DNA transposons (Class II) in *Cinnamomum kanehirae* (17.9%) was comparable to that in black pepper (21.5%) but higher than that in *Liriodendron chinense* (5.6%). The miniature inverted-repeat transposable element (MITE) accounted for 4.0% of transposons in black pepper — a larger fraction of the genome than in similarly sized plant genomes, including the genomes of *Cinnamomum kanehirae* and *Nelumbo nucifera*. However, the Helitrons were less frequent in black pepper (~0.44%), *Liriodendron chinense* (~0.45%) and *Amborella trichopoda* (~0.16%), than they were in *Cinnamomum kanehirae* (~1.07%) (Supplementary Figure 16).

### **Supplementary Note 3**

#### **Non-coding RNA annotation**

Next, tRNA loci (tRNAScan-SE<sup>10</sup>), rRNA (RNAmmer<sup>11</sup>), lncRNAs (intersection of PLE<sup>12</sup>, PLncPRO<sup>13</sup>, RNAplonc (<http://rnaplonc.cp.utfpr.edu.br/about.php>)), snRNA and miRNAs (RfamScan<sup>14</sup>) and non-protein coding genes were annotated by performing homologous searching and deep learning across the assembled genome sequence.

For the RfamScan analysis, Infernal<sup>15</sup> was used to search the black pepper genomic sequences in the Rfam library of CMs from <ftp://ftp.ebi.ac.uk/pub/databases/Rfam/CURRENT/Rfam.cm.gz> and Rfam clanin file from <ftp://ftp.ebi.ac.uk/pub/databases/Rfam/CURRENT/Rfam.clanin> for RNA structure annotations. In total, 256 miRNA genes were predicted and classified into 26 miRNA families (Supplementary Figure 27) and 1533 snRNAs.



## Supplementary Note 4

### Genome synteny and polyploidization

We first performed a self-alignment of the assembled genome sequence using SynMap in the CoGe Comparative Genomics Platform<sup>16</sup> and merged the syntenic blocks using Quota Align Merge algorithm with the default parameters to reveal the evolution of the black pepper genome. The analysis revealed long stretches of duplications within the black pepper genome that are either inter-chromosomal (between chromosomes 1 and 13, 2 and 8, 3 and 15, 4 and 12, 5 and 7, 6 and 24, 9 and 25, 10 and 11) or intra-chromosomal (Pn4 and Pn8) duplications (Supplementary Figure 30). Then, we performed an all-vs-all paralog analysis in the black pepper genome using the reciprocal best hit (RBH) and calculated the synonymous substitution rate ( $K_s$ ) of RBH gene pairs using KaKs\_Calculator v2.0<sup>17</sup> based on the YN model. We detected a single  $K_s$  peak at approximately 0.1 through the  $K_s$  distribution of 31,138 RBH paralogous gene pairs with  $K_s$  greater than 0.02 and less than 3. We also performed a synteny analysis of the black pepper genome using MCScanX<sup>18</sup> with the default parameters and calculated the  $K_s$  distribution of syntenic block gene pairs to distinguish whether this peak represents a whole genome duplication event or background small-scale duplication, as observed in the opium poppy genome<sup>19</sup>. The results clearly show a major peak at around 0.1 (Supplementary Figure 32). In addition, the syntenic  $K_s$  distribution reveals a minor peak at approximately 0.8, indicating that the black pepper genome has undergone additional segmental duplications.

## **Supplementary Note 5**

### **Piperine determination**

High-performance liquid chromatography (HPLC) was used to determine piperine content in pepper berry and tissues, as described<sup>20</sup>. Briefly, all fruit samples were powdered after vacuum freeze drying. Ethanol (95% [m m<sup>-1</sup>]) was used for piperine extraction as previously described<sup>20</sup>. The mobile phase (methanol/H<sub>2</sub>O, 77:23 [v v<sup>-1</sup>]) was used to perform HPLC at a flow rate of 1 ml min<sup>-1</sup>. The identification and quantitation of piperine were performed by comparing the characteristic retention time and relative peak area of the piperine standard purchased from Sigma-Aldrich (purity: 97.0%).

## **Supplementary Note 6**

### **Transcriptome data**

RNA-seq libraries were statistically analysed using FastQC<sup>21</sup> and results were aggregated with MultiQC<sup>22</sup>, as described in Supplementary Figure 36. We also performed a quality assessment of each tissue through sample clustering and visualization (Supplementary Figure 37).

### **Statistical analysis and visualization of transcriptome data**

Unless stated otherwise, all statistical analyses were performed with R version 3.4.2 (R Core Team 2017). Heatmaps were generated with the R `pheatmap`<sup>23</sup> function. Circular plots of tissues (average of three biological repeats) were generated with `circos` v0.69-4 and `circos helper tools` v0.67<sup>24</sup> (Fig. 1). The distribution of differentially expressed genes was displayed using `karyoploteR` package<sup>25</sup> (Supplementary Figure 38).

### **Transcriptomic study linked to piperine biosynthesis**

Differentially expressed genes in berry were analysed using the `DESeq2`<sup>26</sup>. Count matrices were used as the input, as specified in the package manual. The `IHW`<sup>27</sup> package was used to adjust the p-value, with an FDR cut off of 0.05. Differentially expressed genes were further divided into up- or down-regulated genes, depending on the sign of the fold change (FC).

### **Cytoscape visualization of the WGCNA network**

`Cytoscape`<sup>28</sup> was used to visualize the module network obtained from the WGCNA analysis, and modules that contained genes required for piperine biosynthesis were selected. The `MCODE`<sup>29</sup> clustering algorithm was used to cluster all densely connected regions to a highly interconnected region. “Attribute Circle Layout” with “`MCODE_Node_Status`” automatic layout algorithms was performed to arrange all nodes. The genes in different clusters were marked with different colors and shapes. Lines in different colors indicate the connections with specific genes (Supplementary Figure 43).

## Supplementary Note 7

### Phylogenomic analysis

Putative orthologous genes were constructed from nine eudicots (*Coffea canephora*<sup>30</sup>, *Capsicum annuum*<sup>31</sup>, *Camellia sinensis*<sup>32</sup>, *Vitis vinifera*<sup>33</sup>, *Citrus sinensis*<sup>34</sup>, *Nelumbo nucifera*<sup>35</sup>, *Papaver somniferum*<sup>19</sup>, *Macleaya cordata*<sup>36</sup> and *Arabidopsis thaliana*<sup>37</sup>), three monocots (*Oryza sativa japonica*<sup>38</sup>, *Ananas comosus*<sup>39</sup> and *Dendrobium officinale*<sup>40</sup>), three magnoliids (*Liriodendron chinense*<sup>41</sup>, *Cinnamomum kanehirae*<sup>42</sup> and *Persea americana* (transcriptome datasets)<sup>43</sup>), one Amborella species (*Amborella trichopoda*<sup>44</sup>), two gymnosperms (*Gnetum montanum*<sup>45</sup> and *Picea abies*<sup>46</sup>) and the outgroups *Selaginella moellendorffii*<sup>47</sup> and *Physcomitrella patens*<sup>48</sup> were inferred using OrthoMCL<sup>49</sup> and compared with protein-coding genes from the current assembly genome of black pepper to assess the evolution and phylogenetic placement of black pepper among seed plants.

## Supplementary Note 8

### Evolution of gene families related to piperine biosynthesis

The orthologous gene clusters from the black pepper genome and twenty other sequenced plant species (used in phylogenomic analysis of black pepper) were identified using OrthoMCL<sup>49</sup> to investigate the evolutionary processes of piperine biosynthesis.

Redundant and incomplete protein sequences in all genomes were discarded. CAFE v4.2<sup>50</sup> and custom scripts were employed to identify family expansion and contraction.

We then tested for evidence of selection across gene families related to piperine biosynthesis in HyPhy<sup>51</sup> using the datamonkey webserver<sup>52</sup>. The aligned and trimmed gene family files were first used to screen for evidence of recombination and topological incongruence with a breakpoint at nucleotide positions via the Genetic Algorithm for Recombination Detection (GARD) method<sup>53</sup>. Then, we proceeded to a subsequent selection analysis (SLAC<sup>54</sup> and MEME<sup>55</sup>) with a significance threshold of  $\alpha = 0.1$ .

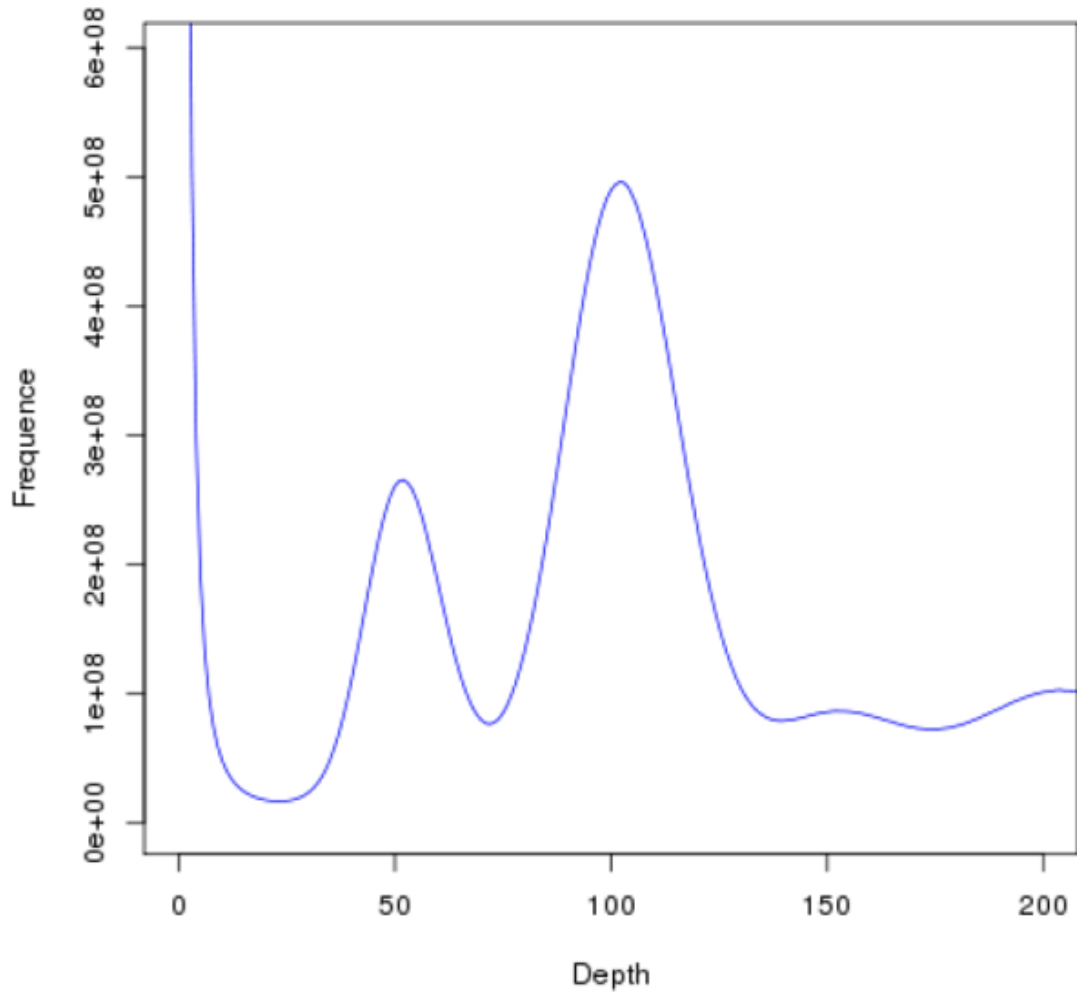

**Supplementary Figure 1. Kmer frequency distributions.** When k-mer=17, a frequency peak value at 101 is observed and used to estimate the genome size.

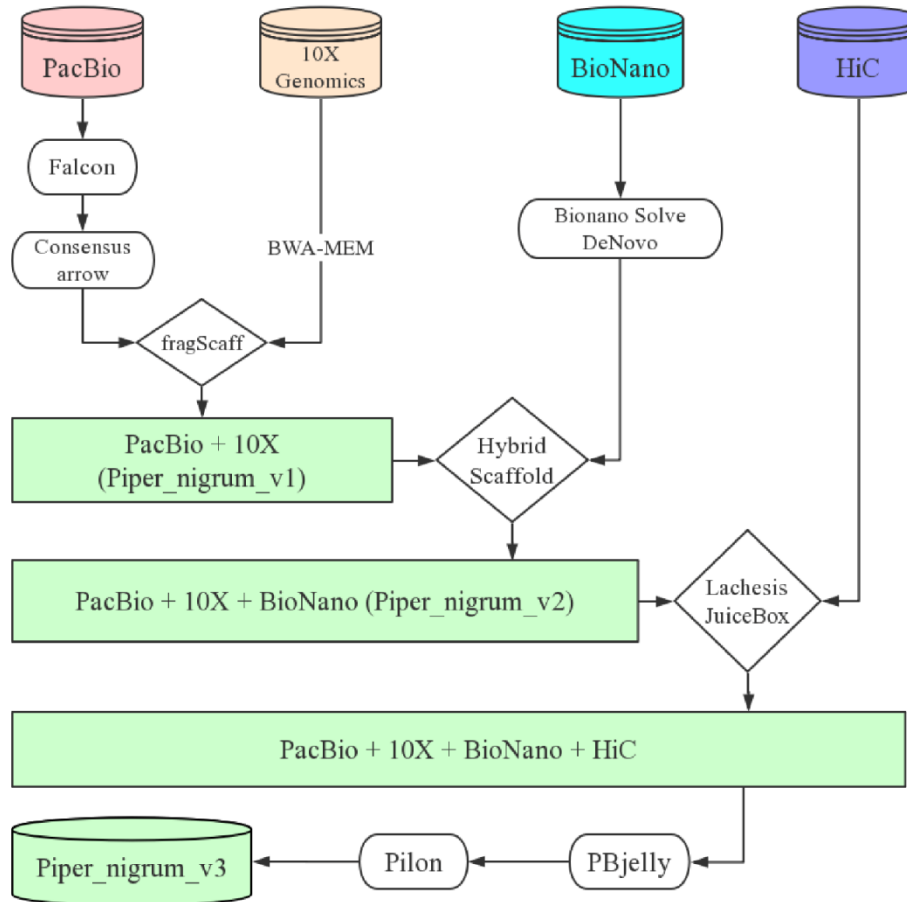

**Supplementary Figure 2. Overview of the processing pipeline used to assemble the black pepper genome.** Four datasets, PacBio reads, 10X Genomics Linked-reads, BioNano molecule and Hi-C mapping, were used for hybrid assembly strategy. PacBio reads were used to performed contigs assembly and preliminary extension with Linked-reads from 10X Genomics sequencing, which were defined as “Piper\_nigrum\_v1” assembly version. Subsequently, the BioNano DLS optical mapping was used to order and orient these scaffolds into superscaffolds (Piper\_nigrum\_v2), and Hi-C mapping was used to anchor and orient the scaffolds into pseudomolecule. The additional round of gap filling and polished were performed to yield final version of assembly “Piper\_nigrum\_v3”.

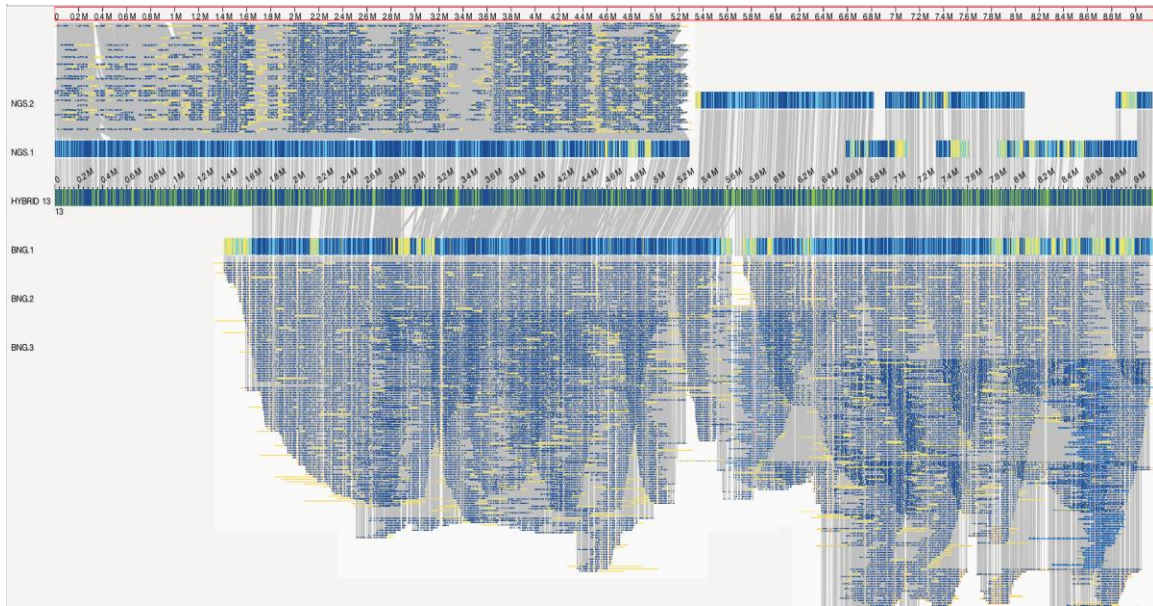

**Supplementary Figure 3. Use of BioNano molecules to extend and connect scaffolds from the PacBio and Chromium 10X assembly.** The dark blue bar in the middle represents the assembled scaffold based on NGS and BioNano molecules. The blue bar above represents the assembled scaffolds based on NGS, and below represents the assembled BioNano molecules. Each blue line represents a BioNano molecule and yellow represents the molecule labels.



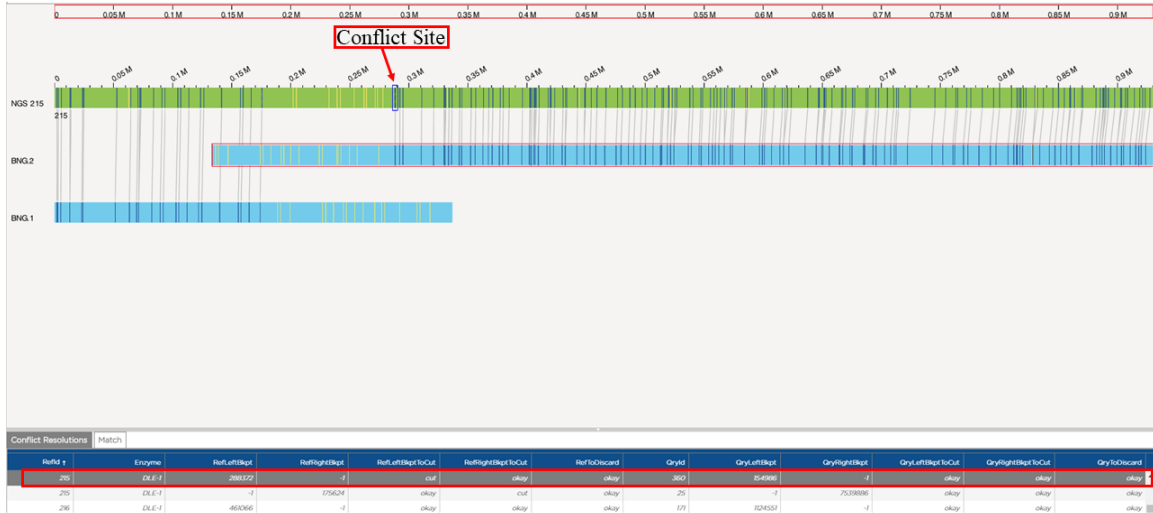

**Supplementary Figure 4. A conflict site that occurred during the BioNano hybridScaffold step.** The green bar represents an assembled scaffold based on NGS reads and cyan represents BioNano molecules. Yellow lines in the bars represent the molecule labels. The grey line will connect the scaffold and BioNano molecules when this region has corresponding labels. Otherwise, it is defined as a conflict site.

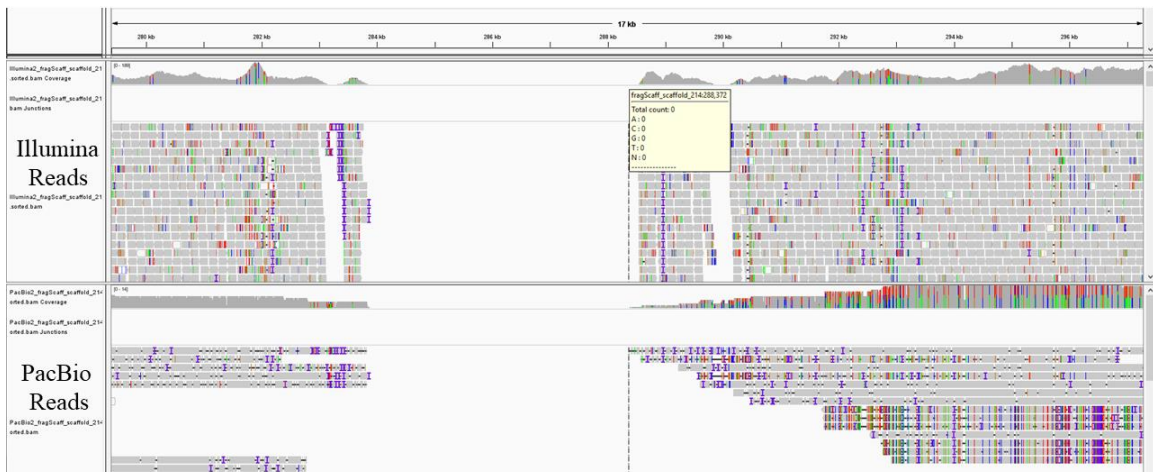

**Supplementary Figure 5. Map of the Illumina and PacBio long reads to Piper\_nigrum\_v1 to examine the conflict sites.** The mapped BAM files were visualized in IGV.

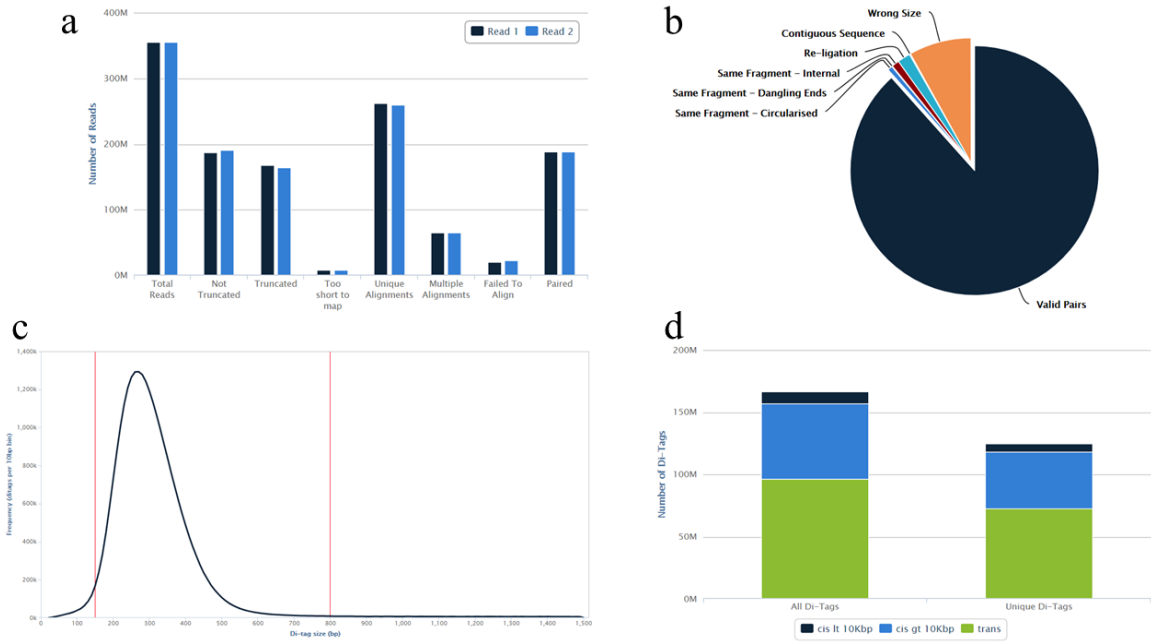

**Supplementary Figure 6. HiCUP report of Hi-C data.** (a) Statistics of truncated and mapped reads. (b) Statistics of reads after filtering. (c) Di-tag length distribution. (d) De-duplicated reads.

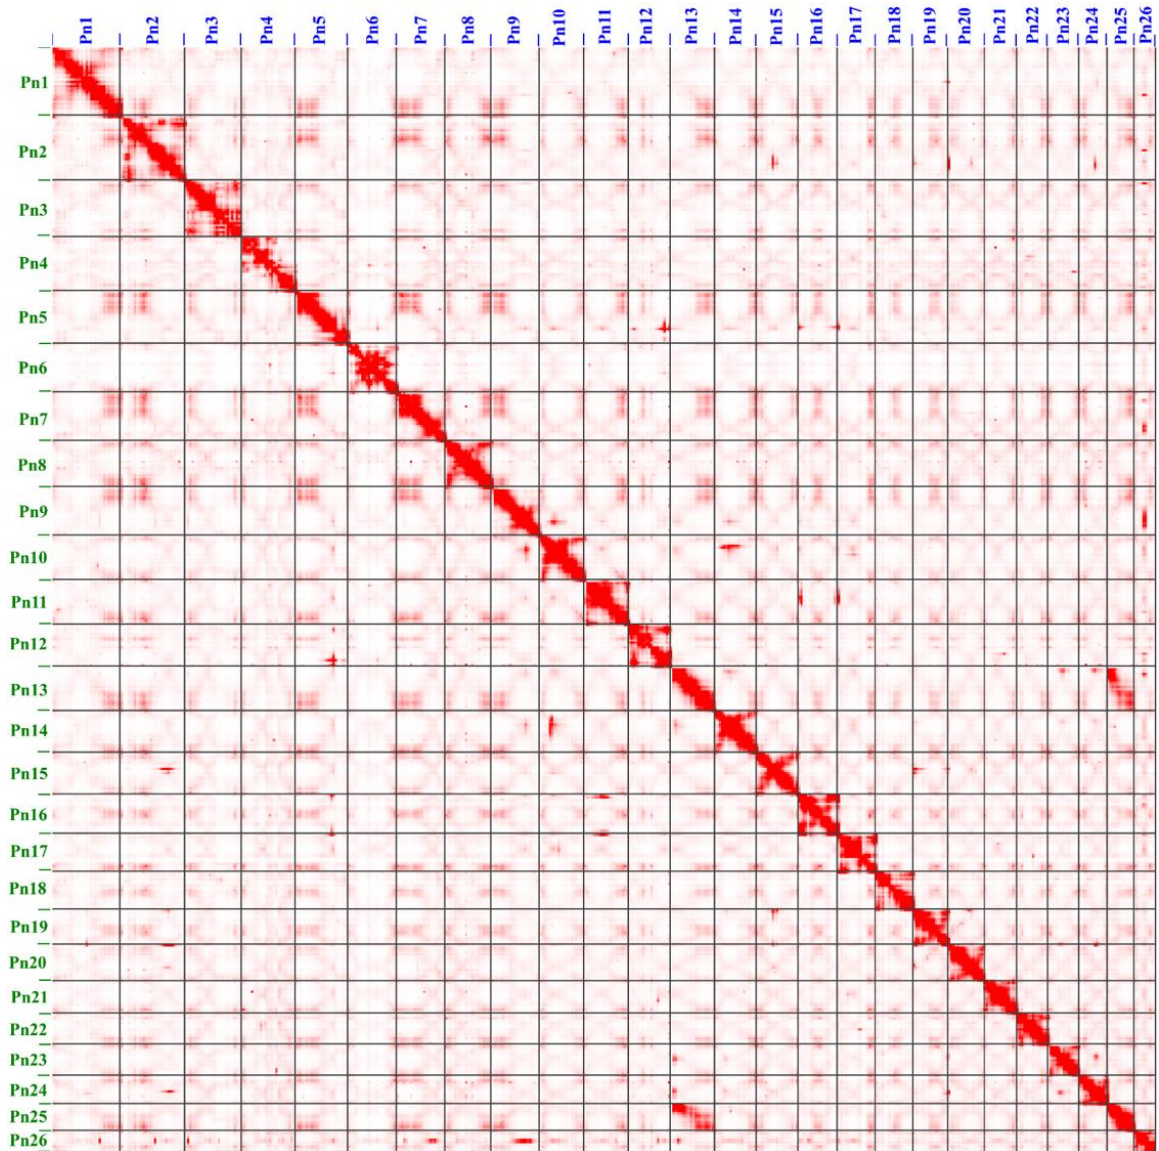

**Supplementary Figure 7. Hi-C map of the black pepper genome showing genome-wide all-by-all interactions.** The map shows high-level interactions that occur within chromosomes (cis) rather than between chromosomes (trans).

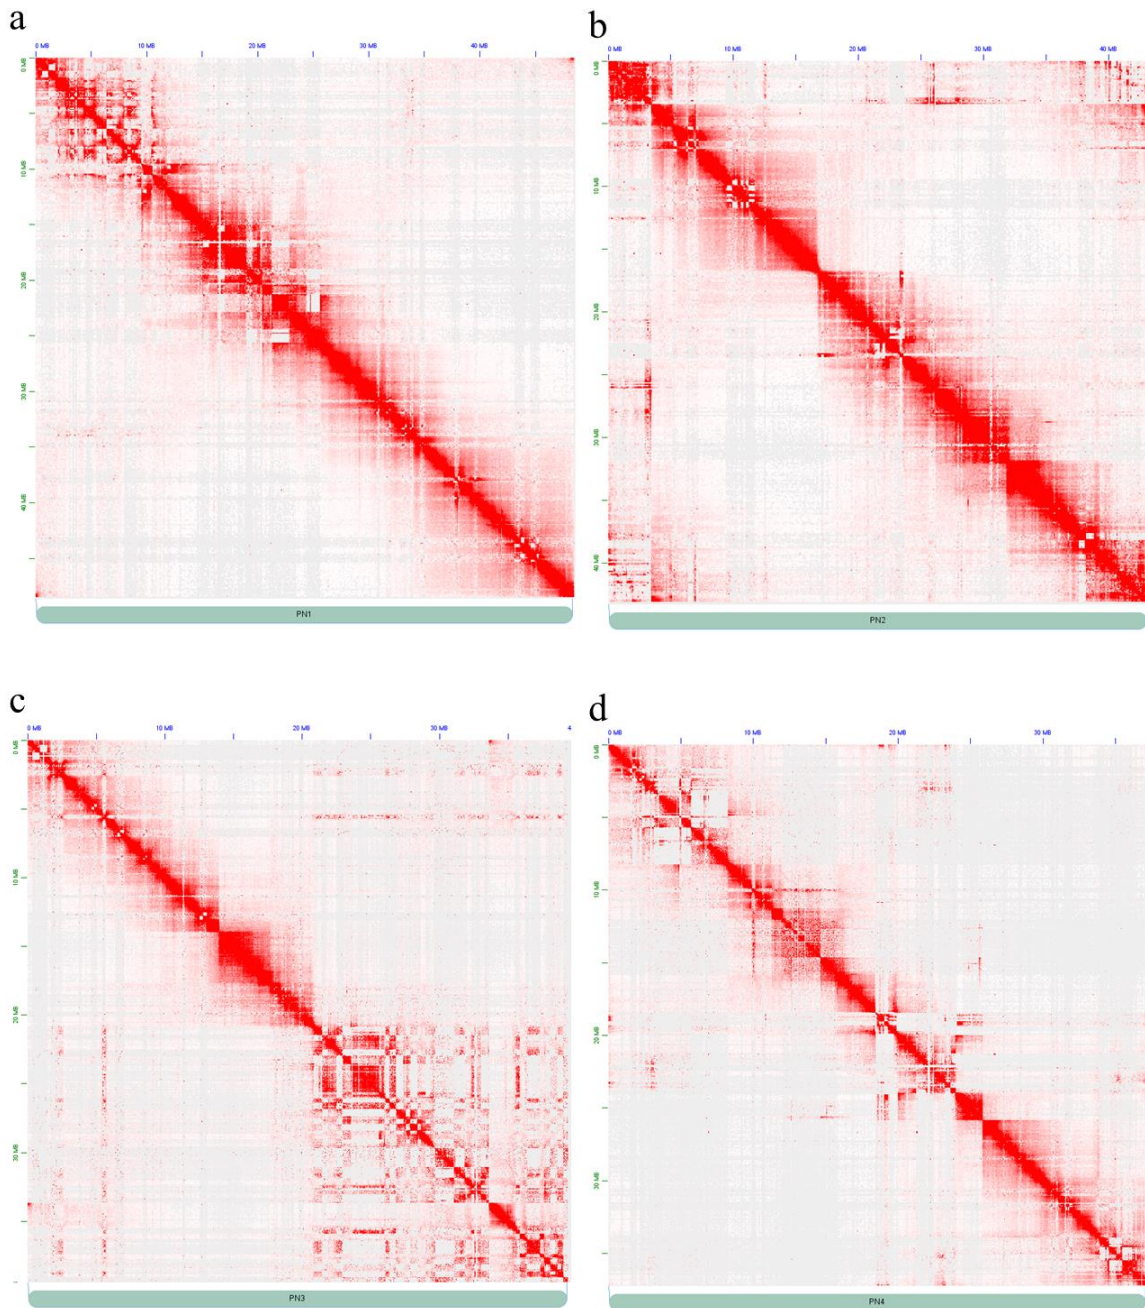

**Supplementary Figure 8. Chromatin interactions in chromosome 1 to 4 of black pepper.** (a-d) Each heatmap shows the observed values at a resolution of 100 Kb and normalization with balancing.

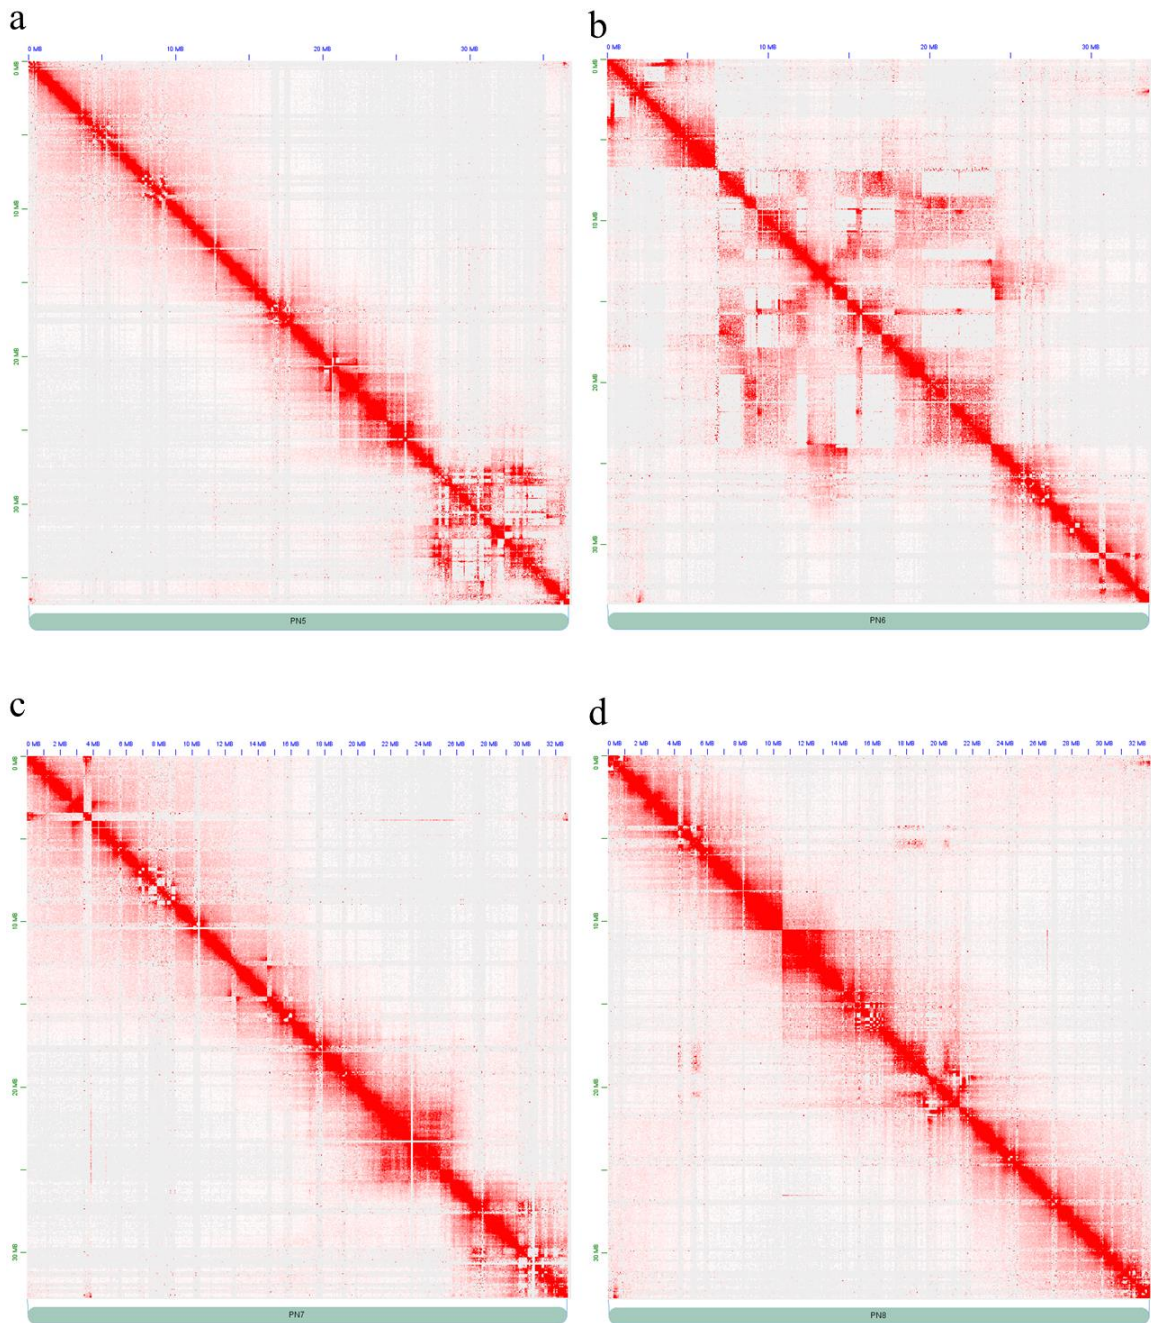

**Supplementary Figure 9. Chromatin interactions in chromosome 5 to 8 of black pepper.** (a-d) Each heatmap shows the observed values at a resolution of 100 Kb and normalization with balancing.

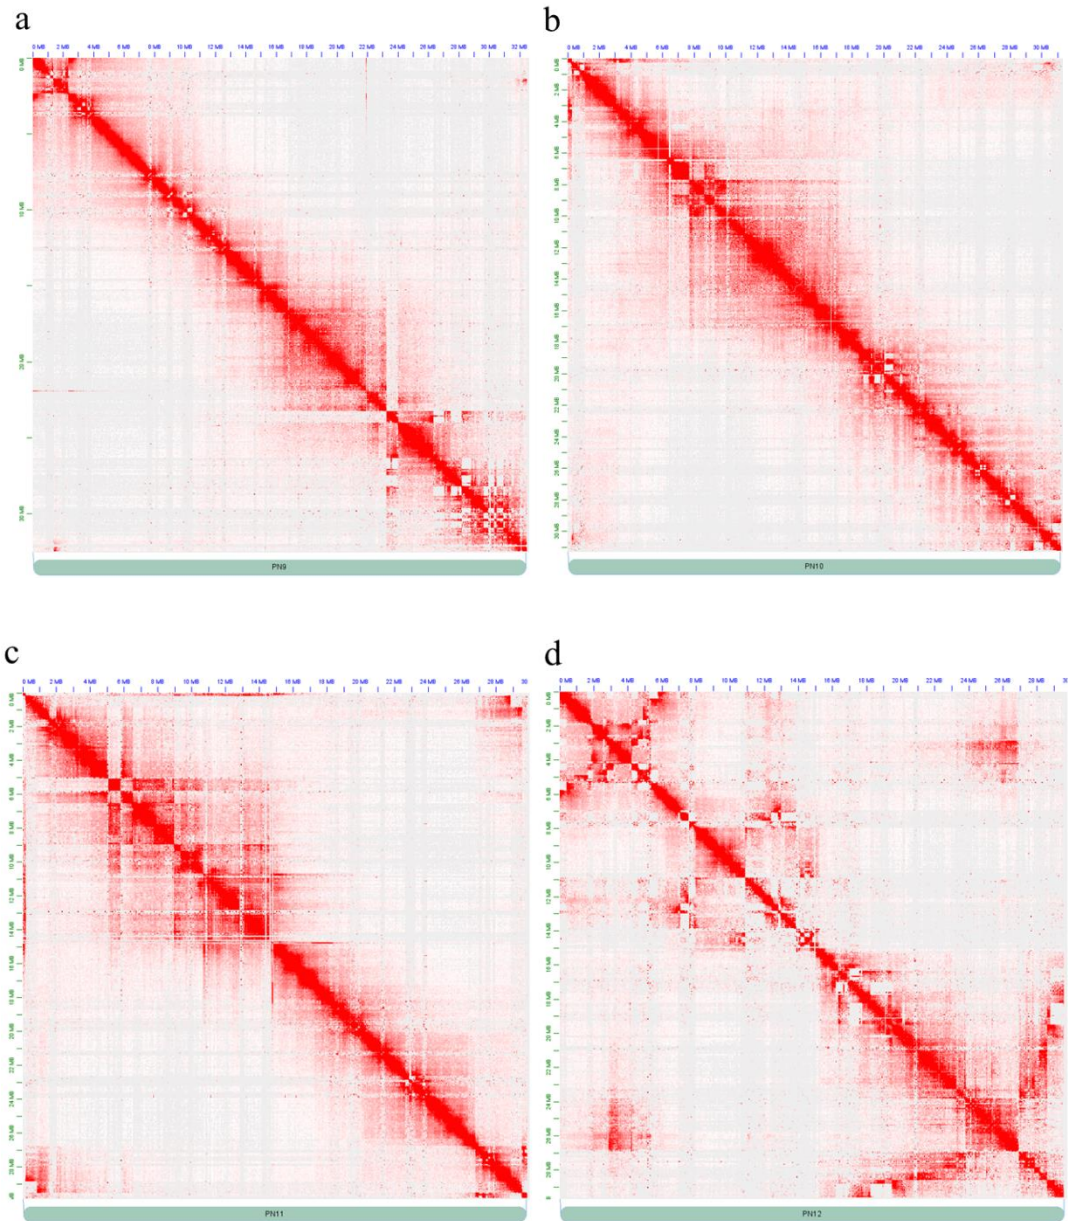

**Supplementary Figure 10. Chromatin interactions in chromosome 9 to 12 of black pepper.** (a-d) Each heatmap shows the observed values at a resolution of 100 Kb and normalization with balancing.

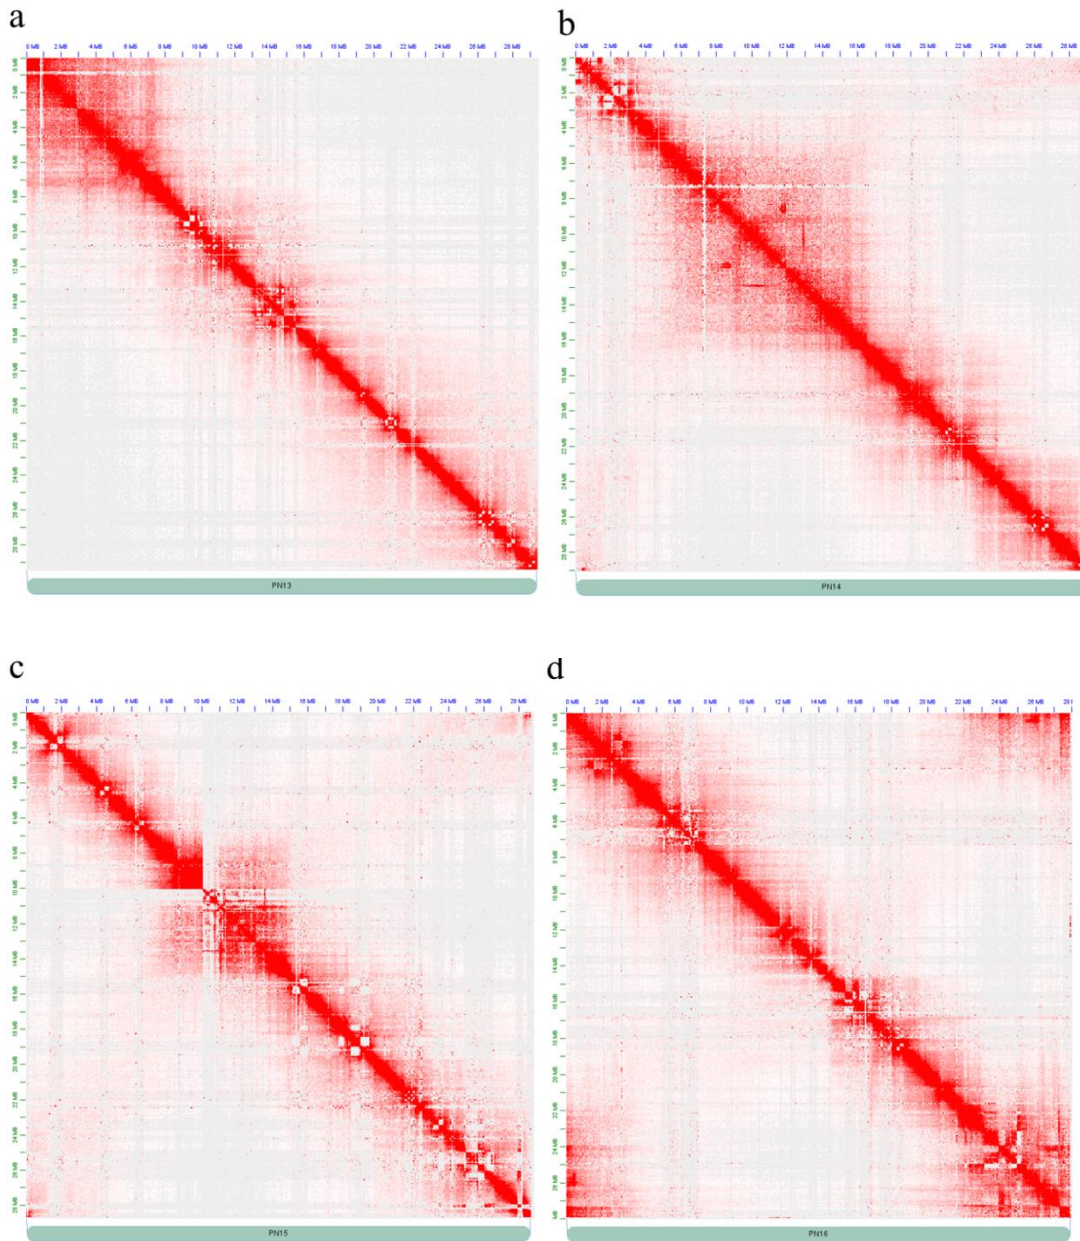

**Supplementary Figure 11. Chromatin interactions in chromosome 13 to 16 of black pepper.** (a-d) Each heatmap shows the observed values at a resolution of 100 Kb and normalization with balancing.

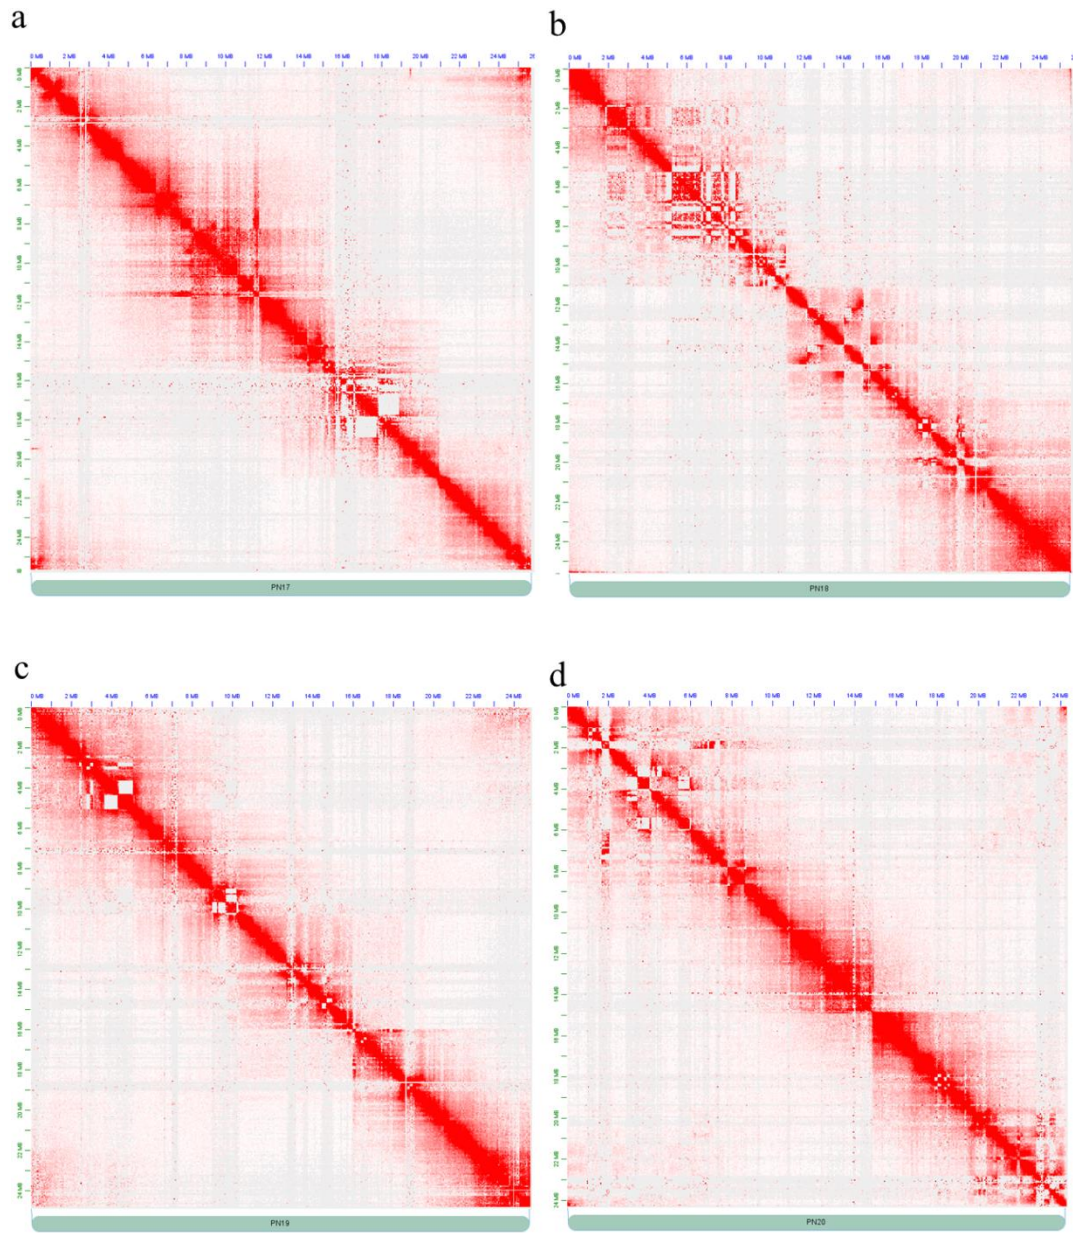

**Supplementary Figure 12. Chromatin interactions in chromosome 17 to 20 of black pepper.** (a-d) Each heatmap shows the observed values at a resolution of 100 Kb and normalization with balancing.



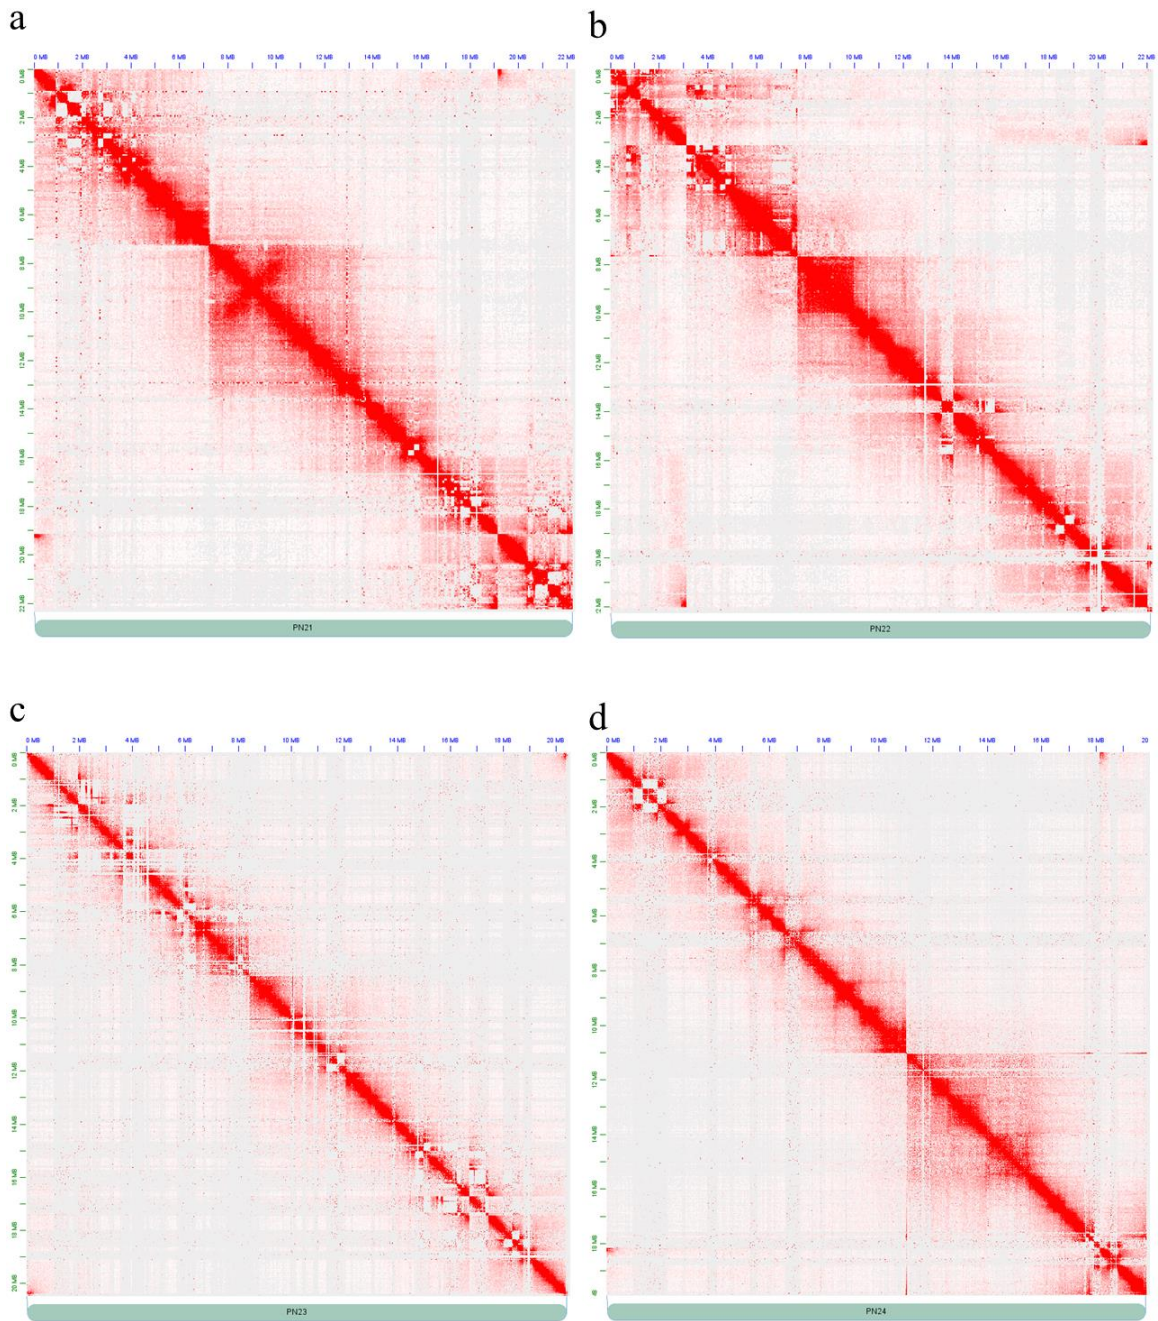

**Supplementary Figure 13. Chromatin interactions in chromosome 21 to 24 of black pepper.** (a-d) Each heatmap shows the observed values at a resolution of 100 Kb and normalization with balancing.

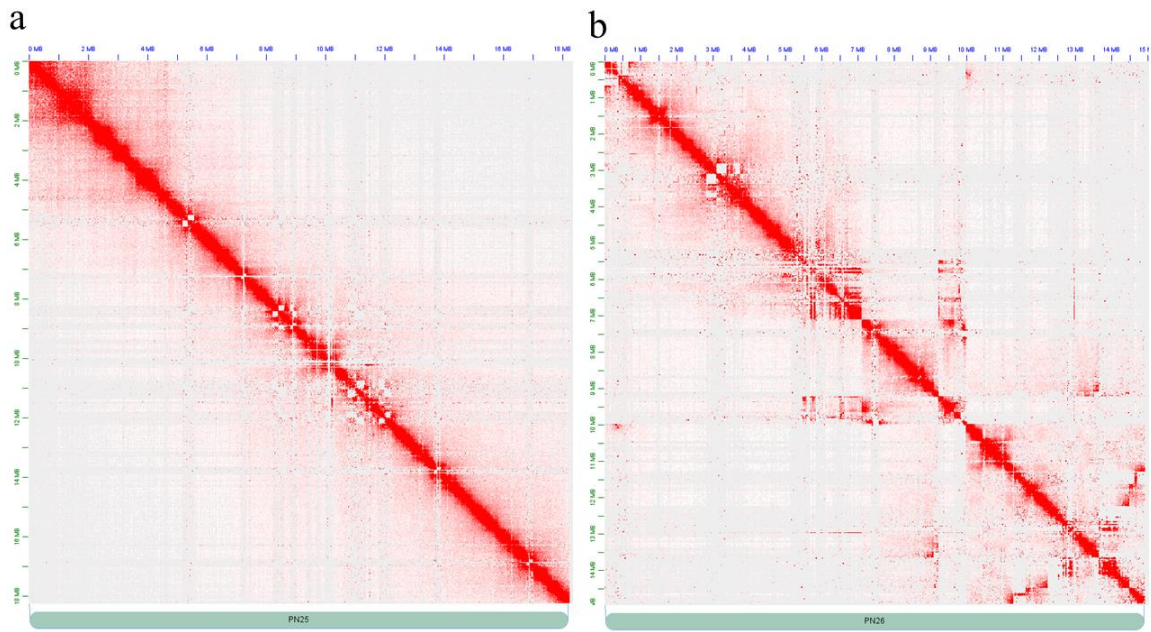

**Supplementary Figure 14. Chromatin interactions in chromosome 25 and 26 of black pepper.** (a-b) Each heatmap shows the observed values at a resolution of 100 Kb and normalization with balancing.

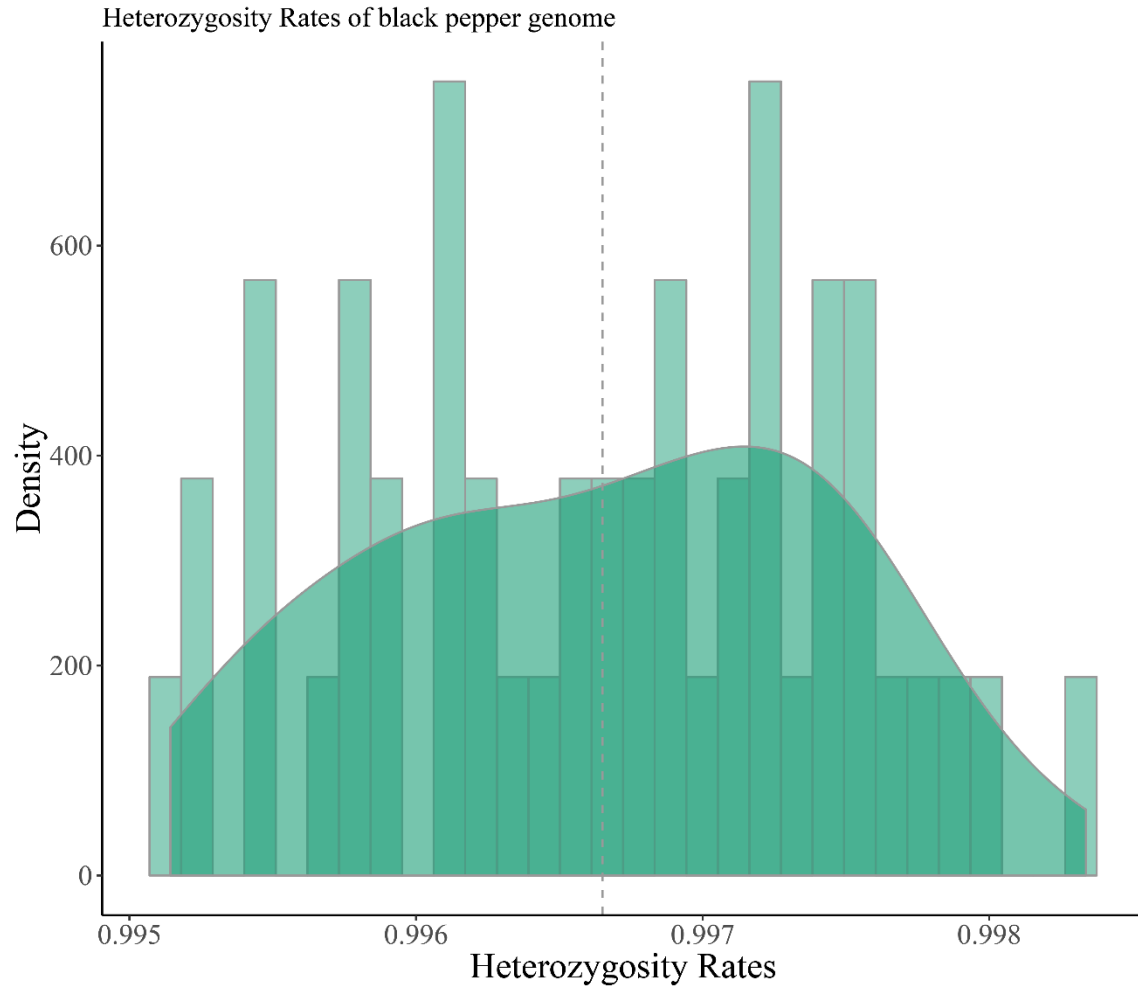

**Supplementary Figure 15. Heterozygosity rates of the black pepper genome based on SNP calling.** The dashed line indicates the mean value of the heterozygosity rates.

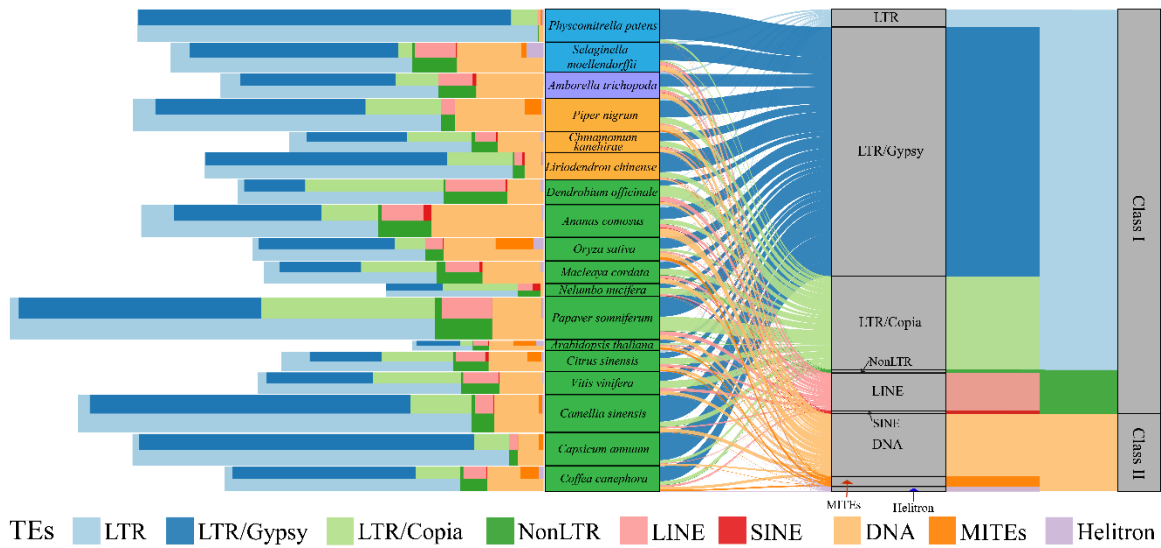

**Supplementary Figure 16. Distribution of TEs in species analysed in this study.** The size of the bars and flows indicates the percentage of base pairs present in TEs in the genomic sequence. Retrotransposons (Class I) are shown in shades of cyan, and DNA transposons (Class II) are shown in shades of blue. The relative frequency as percentages of Gypsy, Copia, LINE, SINE, MITEs, Helitron, and unclassified LTR, NonLTR, DNA are represented in different colours. The species order is consistent with the species tree of black pepper.

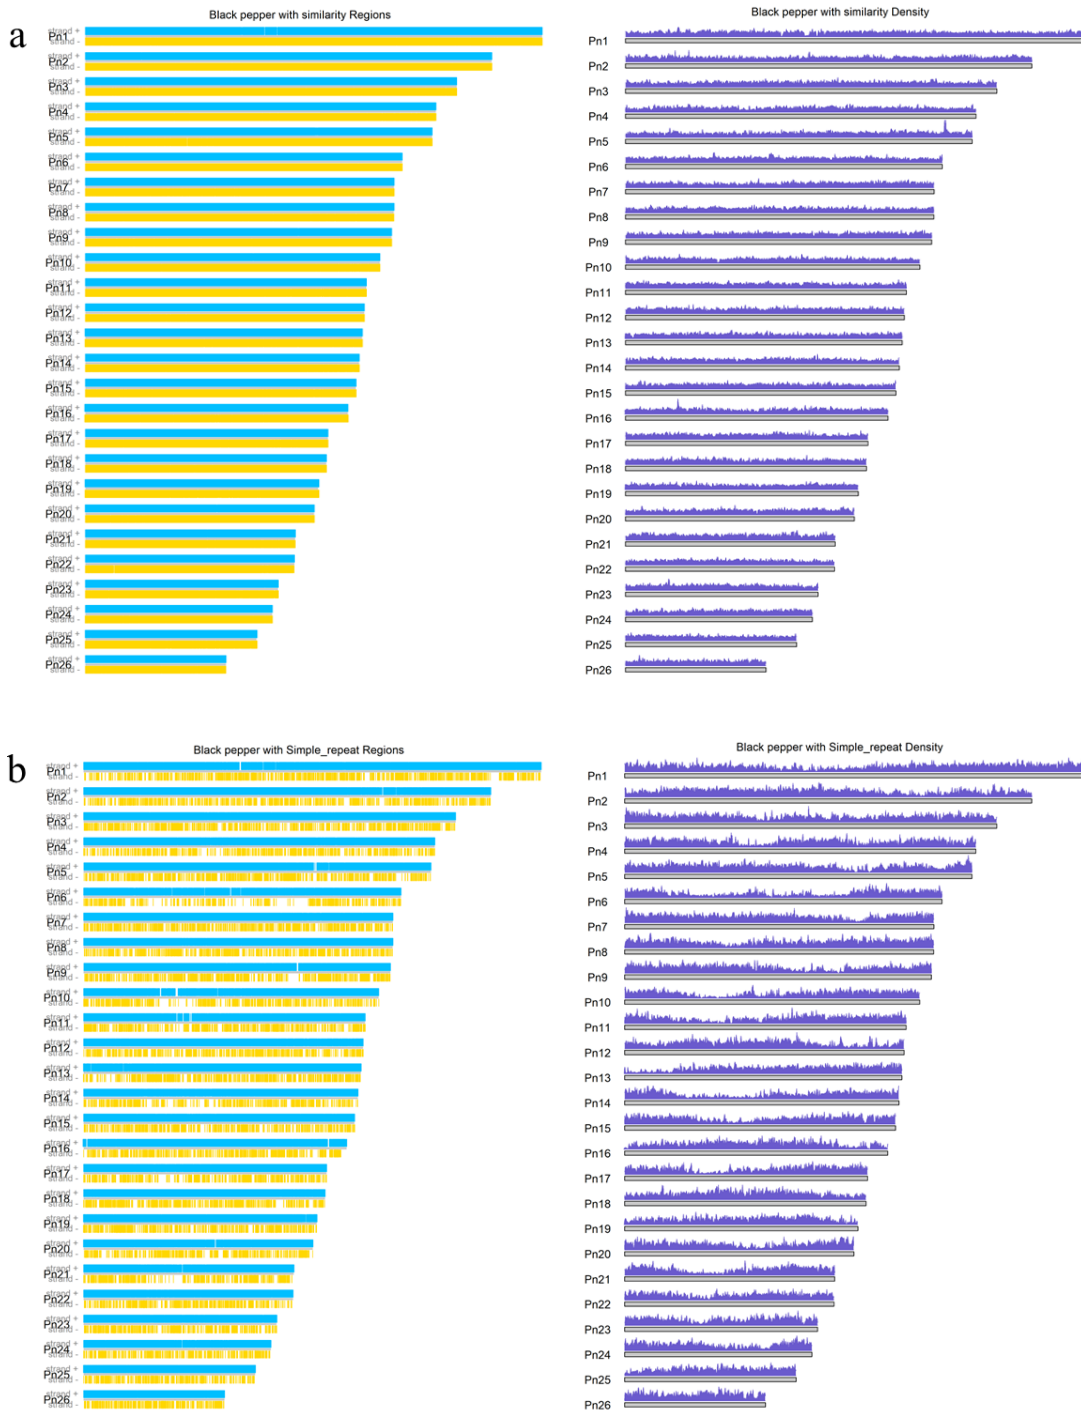

**Supplementary Figure 17. Repeat regions and density of the black pepper genome.**

(a) Repeat regions and density of all repeat sequences in the black pepper genome. (b) Repeat regions and density of simple repeat sequences in the black pepper genome.

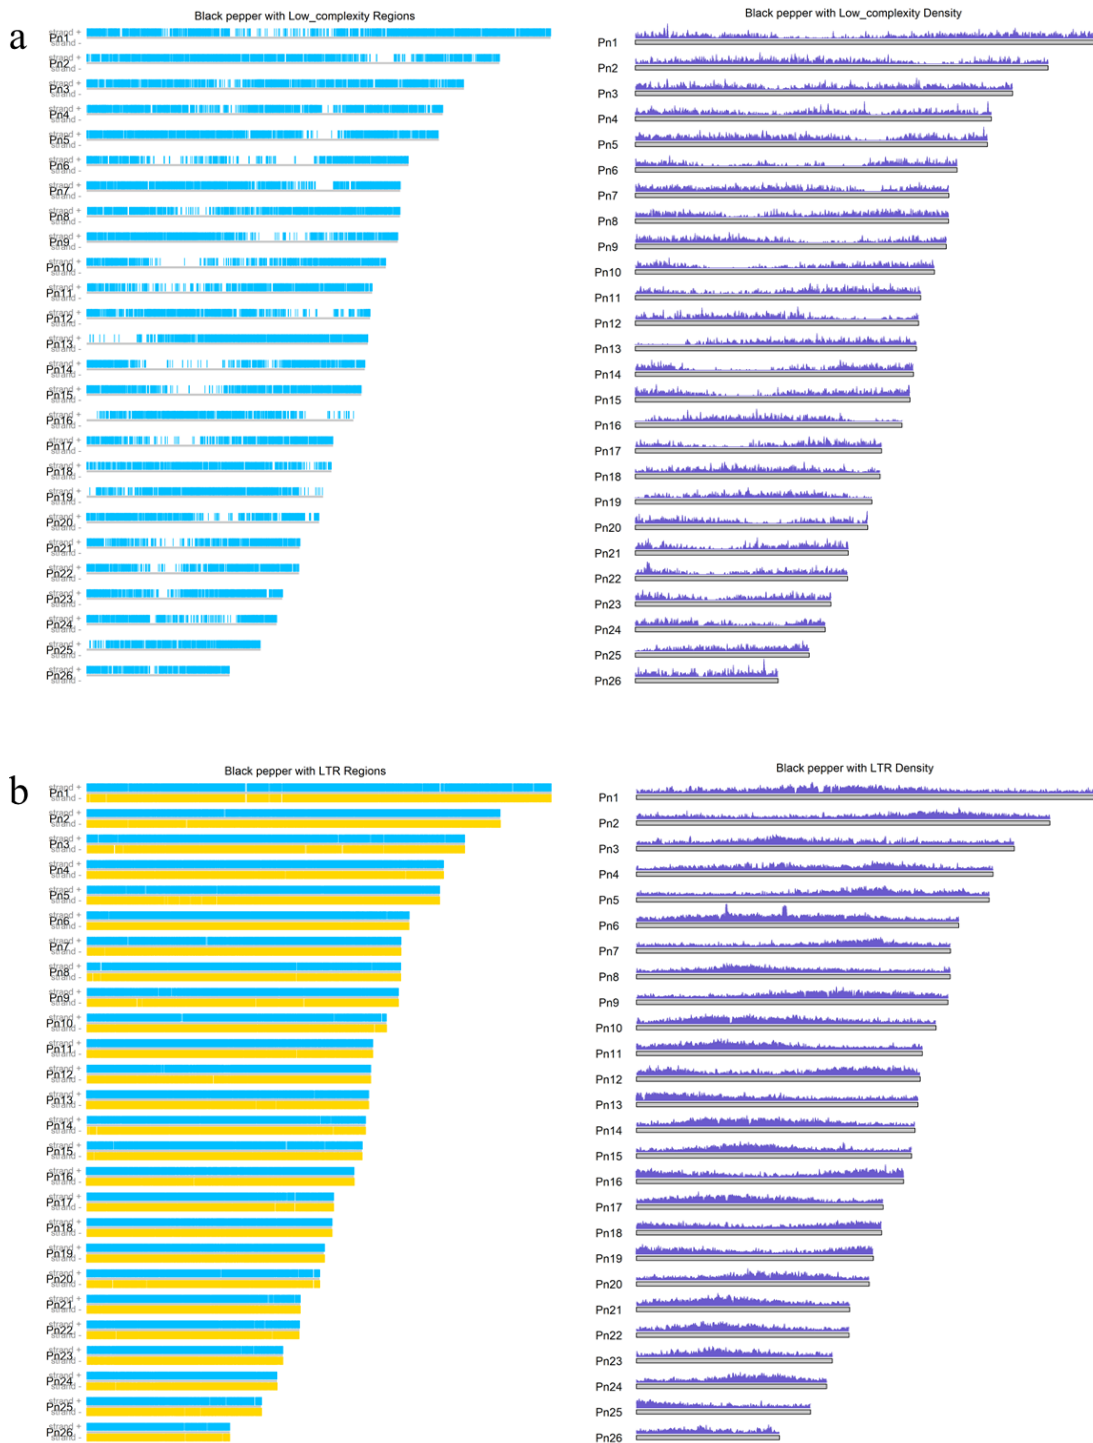

**Supplementary Figure 18. Repeat regions and density of the black pepper genome.**

(a) Repeat regions and density of low complexity repeat sequences in the black pepper genome. (b) Repeat regions and density of LTR sequences in the black pepper genome.

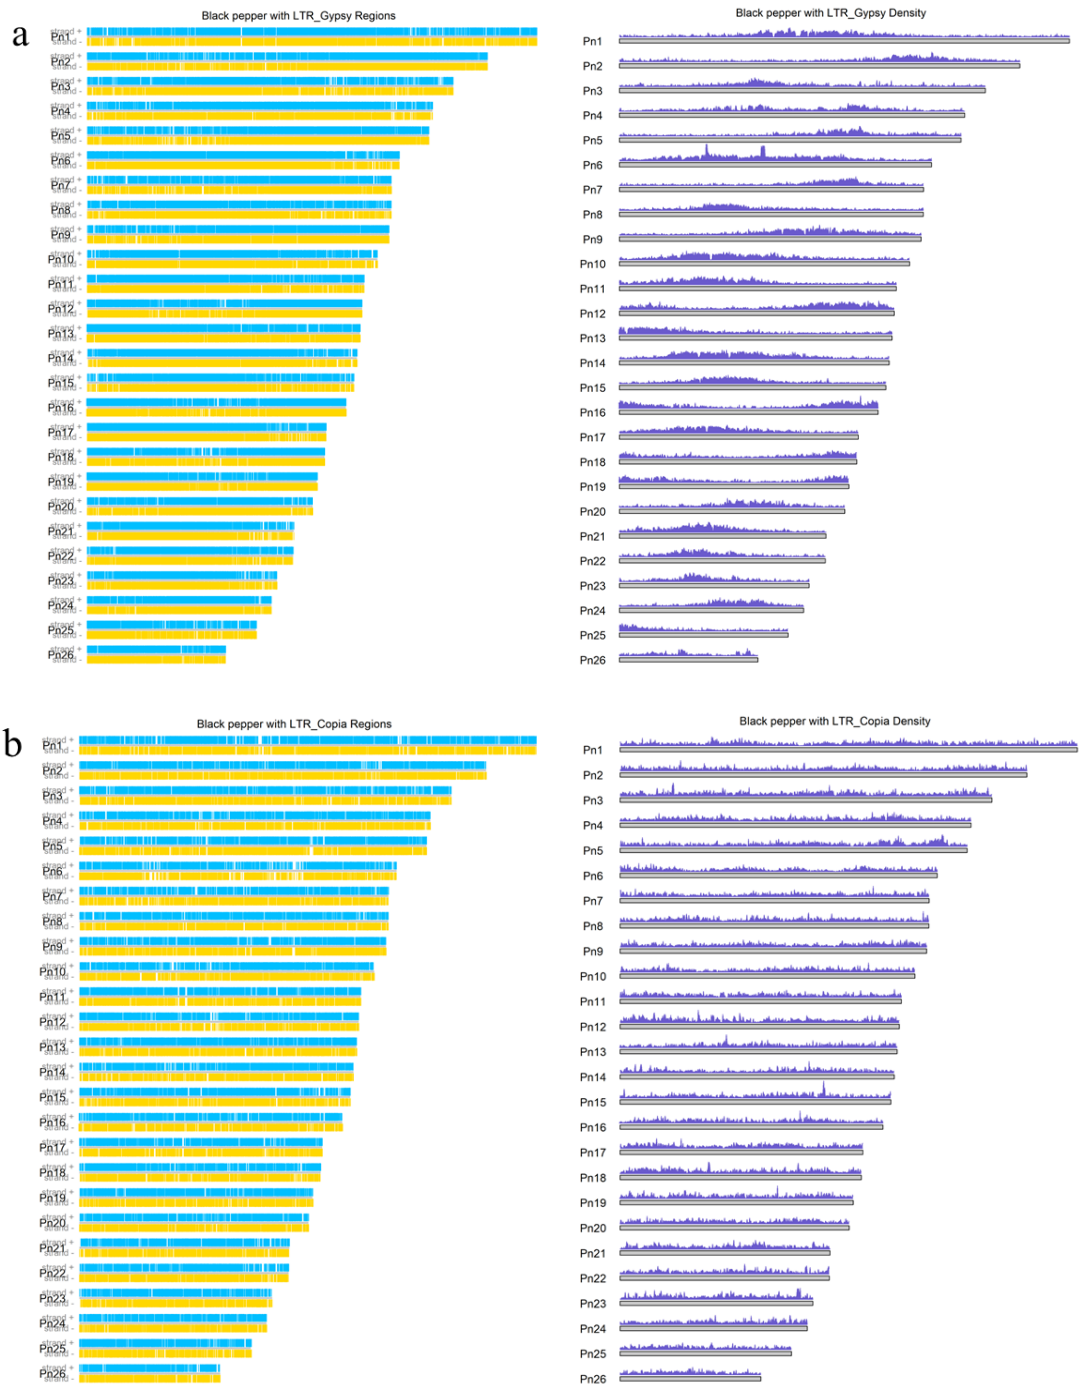

**Supplementary Figure 19. Repeat regions and density of the black pepper genome.**

(a) Repeat regions and density of LTR/Gypsy repeat sequences in the black pepper genome. (b) Repeat regions and density of LTR/Copia repeat sequences in the black pepper genome.

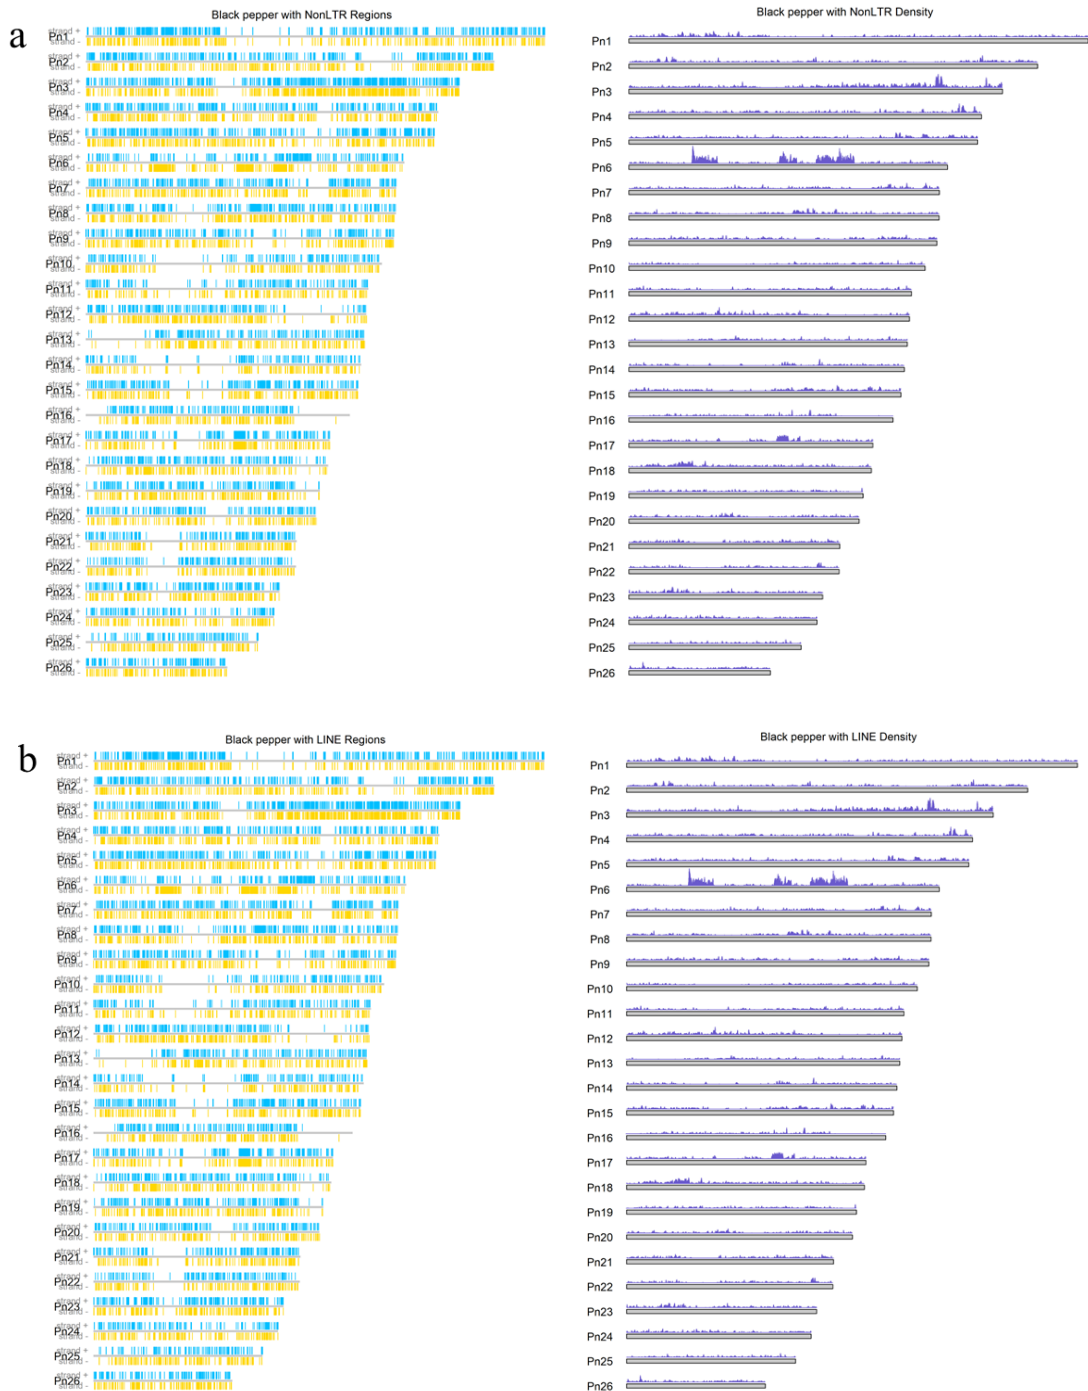

**Supplementary Figure 20. Repeat regions and density of the black pepper genome.**  
 (a) Repeat regions and density of NonLTR repeat sequences in the black pepper genome.  
 (b) Repeat regions and density of LINE repeat sequences in the black pepper genome.



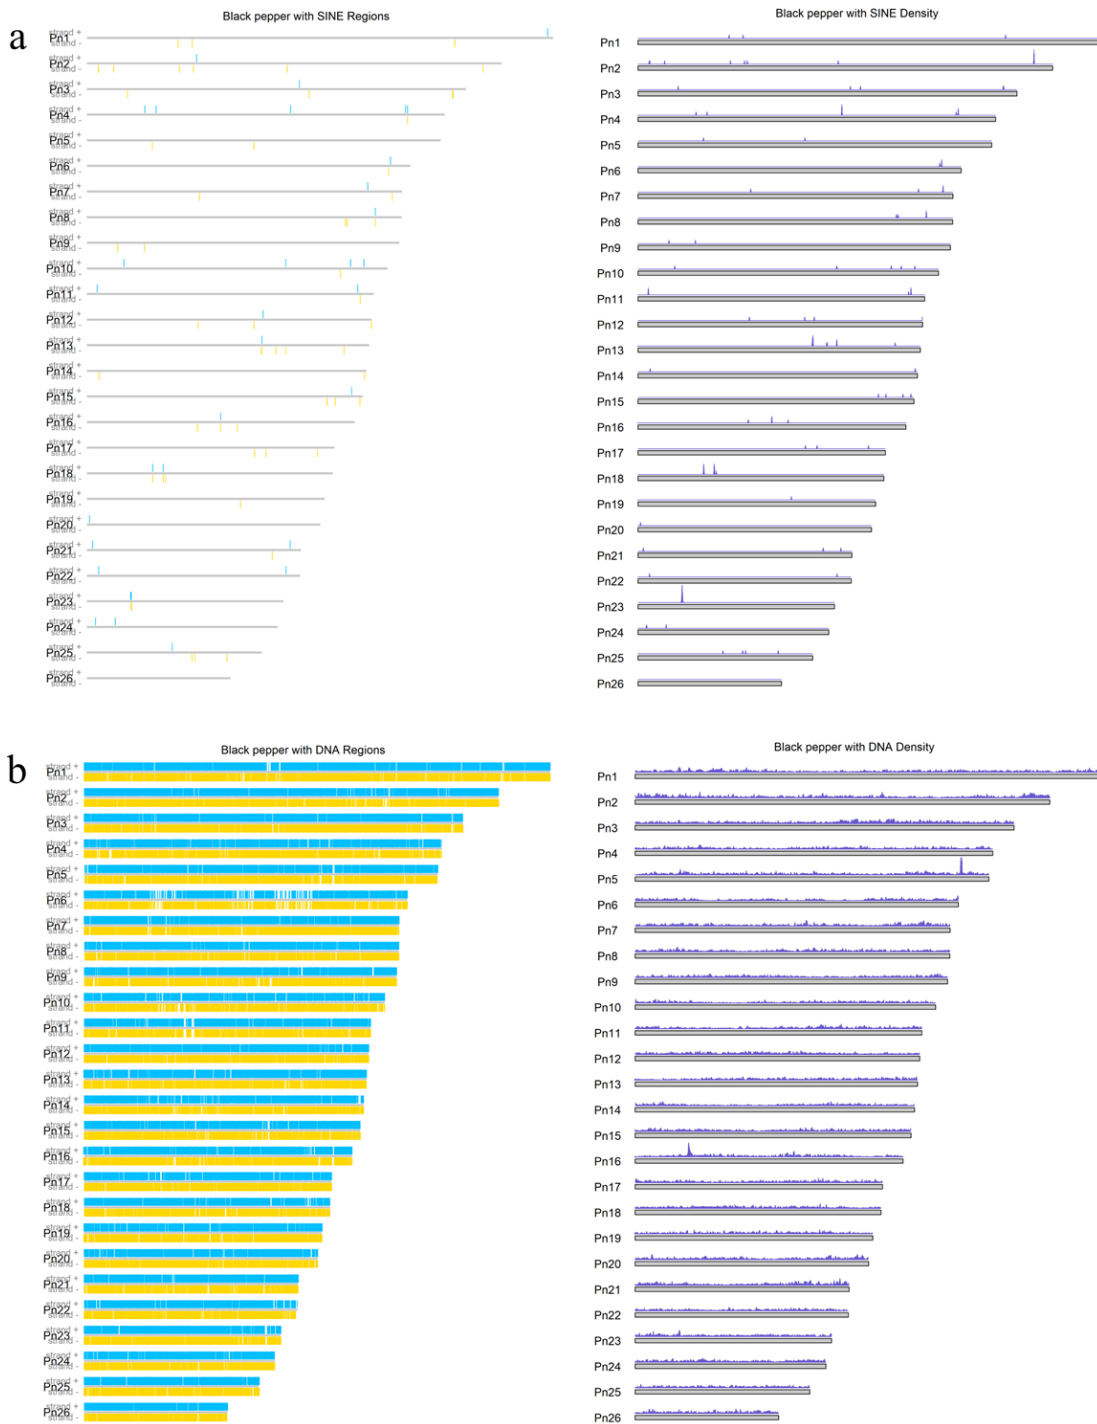

**Supplementary Figure 21. Repeat regions and density of the black pepper genome.**

(a) Repeat regions and density of SINE repeat sequences in the black pepper genome. (b)

Repeat regions and density of DNA transposons in the black pepper genome.

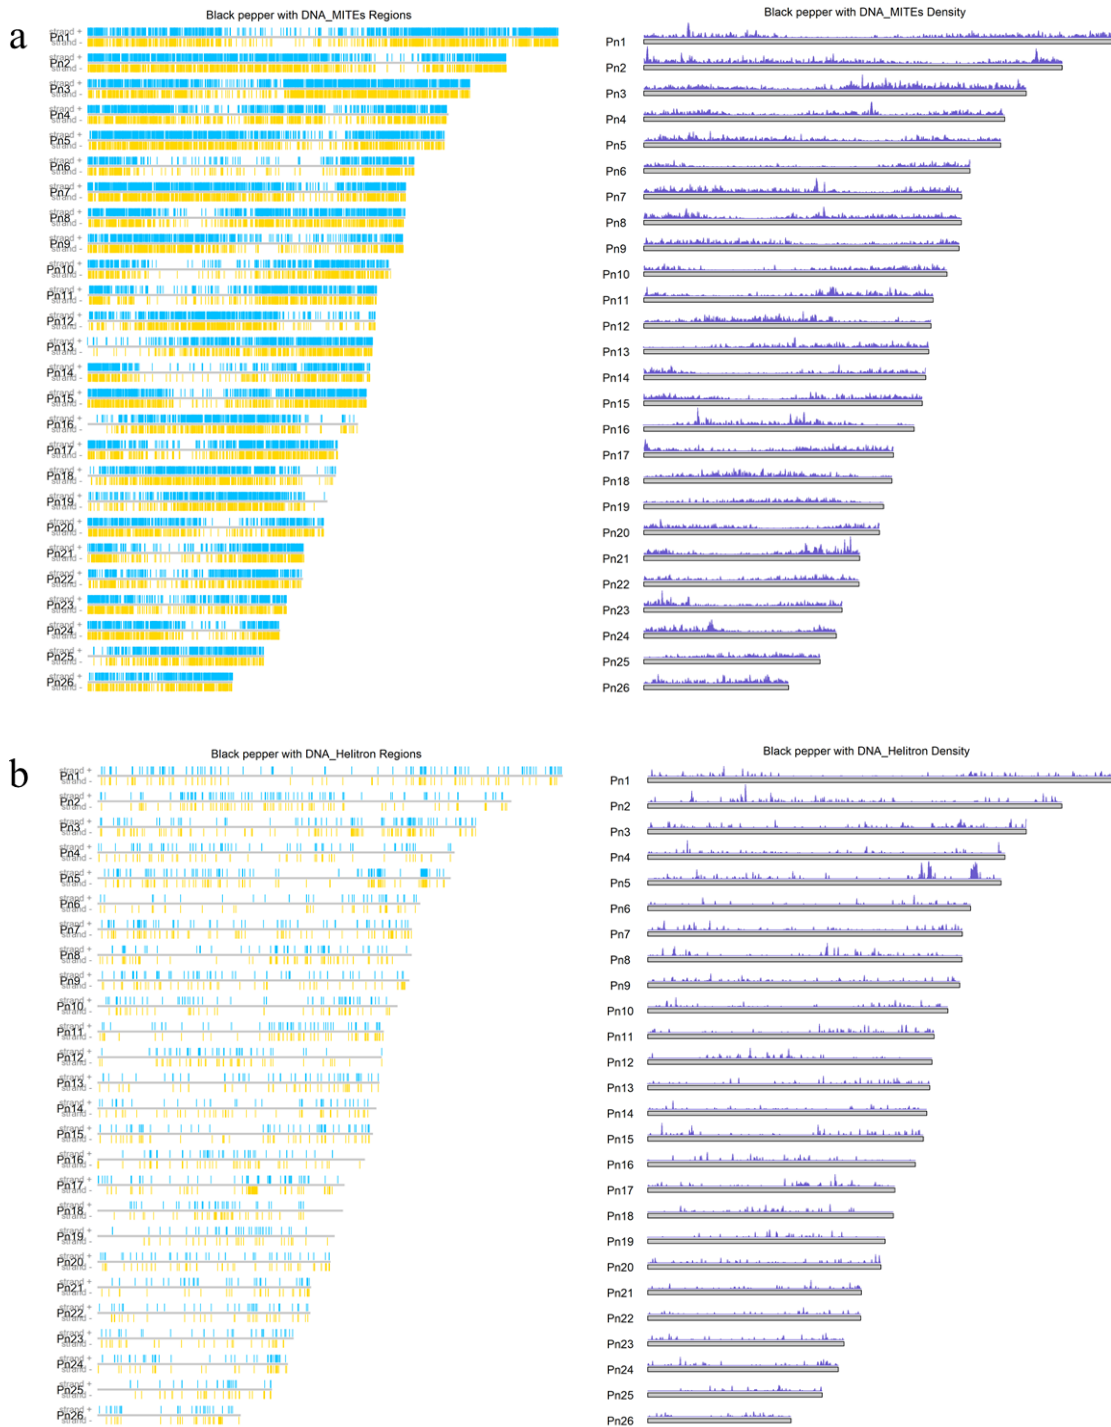

**Supplementary Figure 22. Repeat regions and density of the black pepper genome.**  
 (a) Repeat regions and density of MITE repeat sequences in the black pepper genome. (b) Repeat regions and density of Helitron repeat sequences in the black pepper genome.

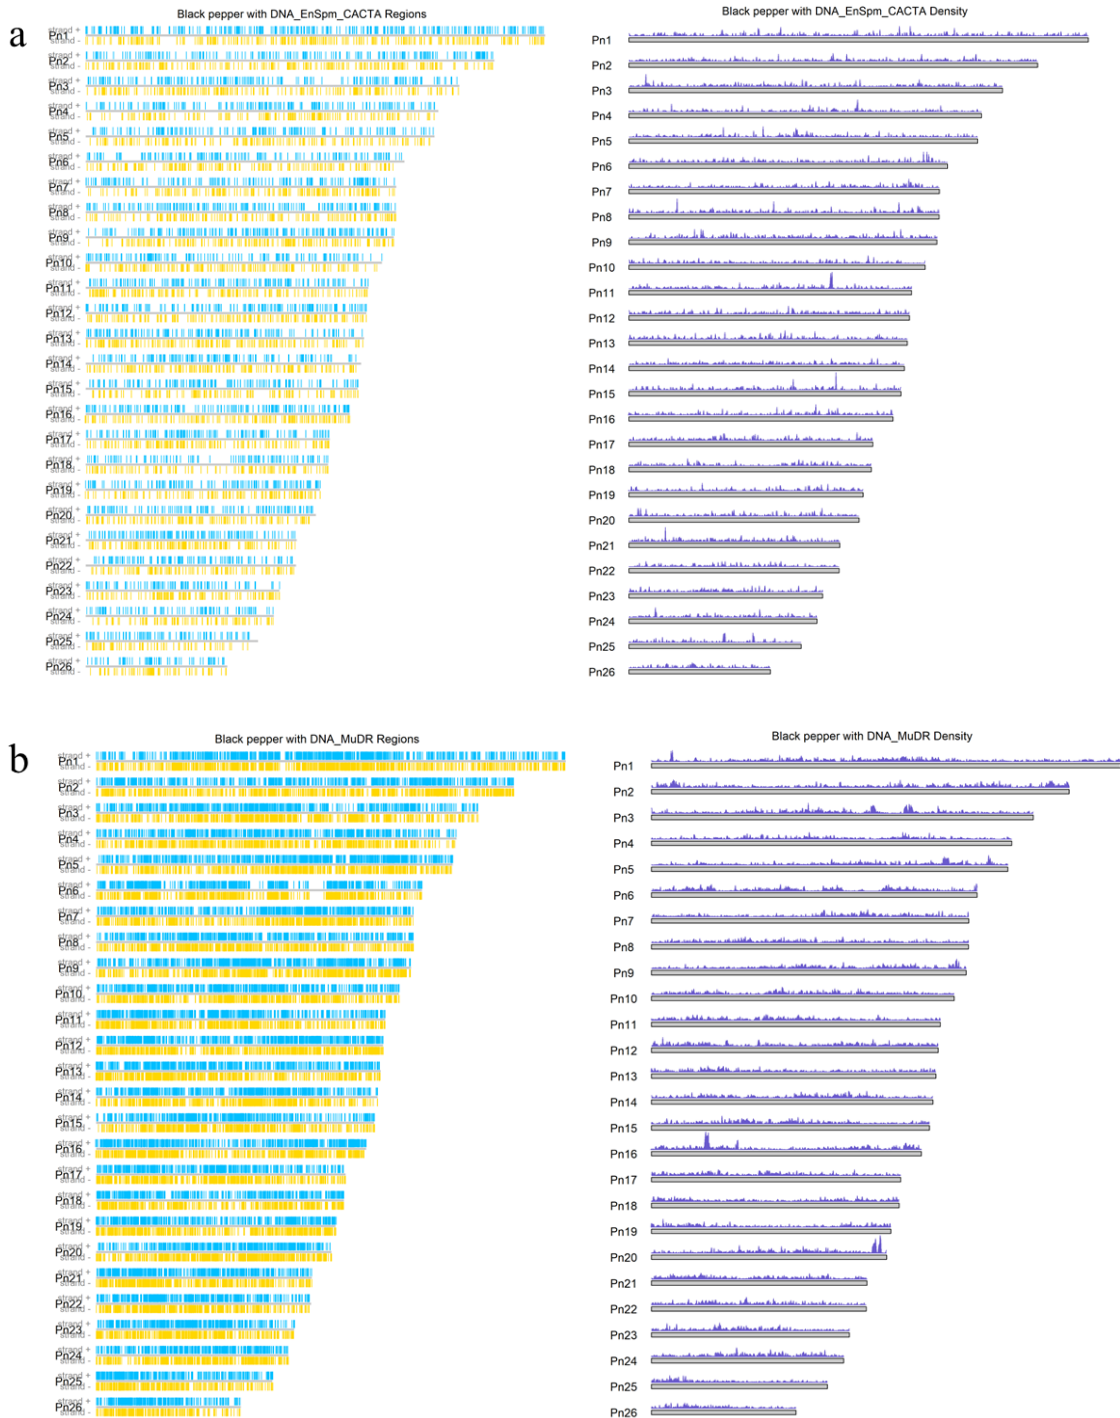

**Supplementary Figure 23. Repeat regions and density of the black pepper genome.** (a) Repeat regions and density of EnSpm/CACTA repeat sequences in the black pepper genome. (b) Repeat regions and density of MuDR repeat sequences in the black pepper genome.

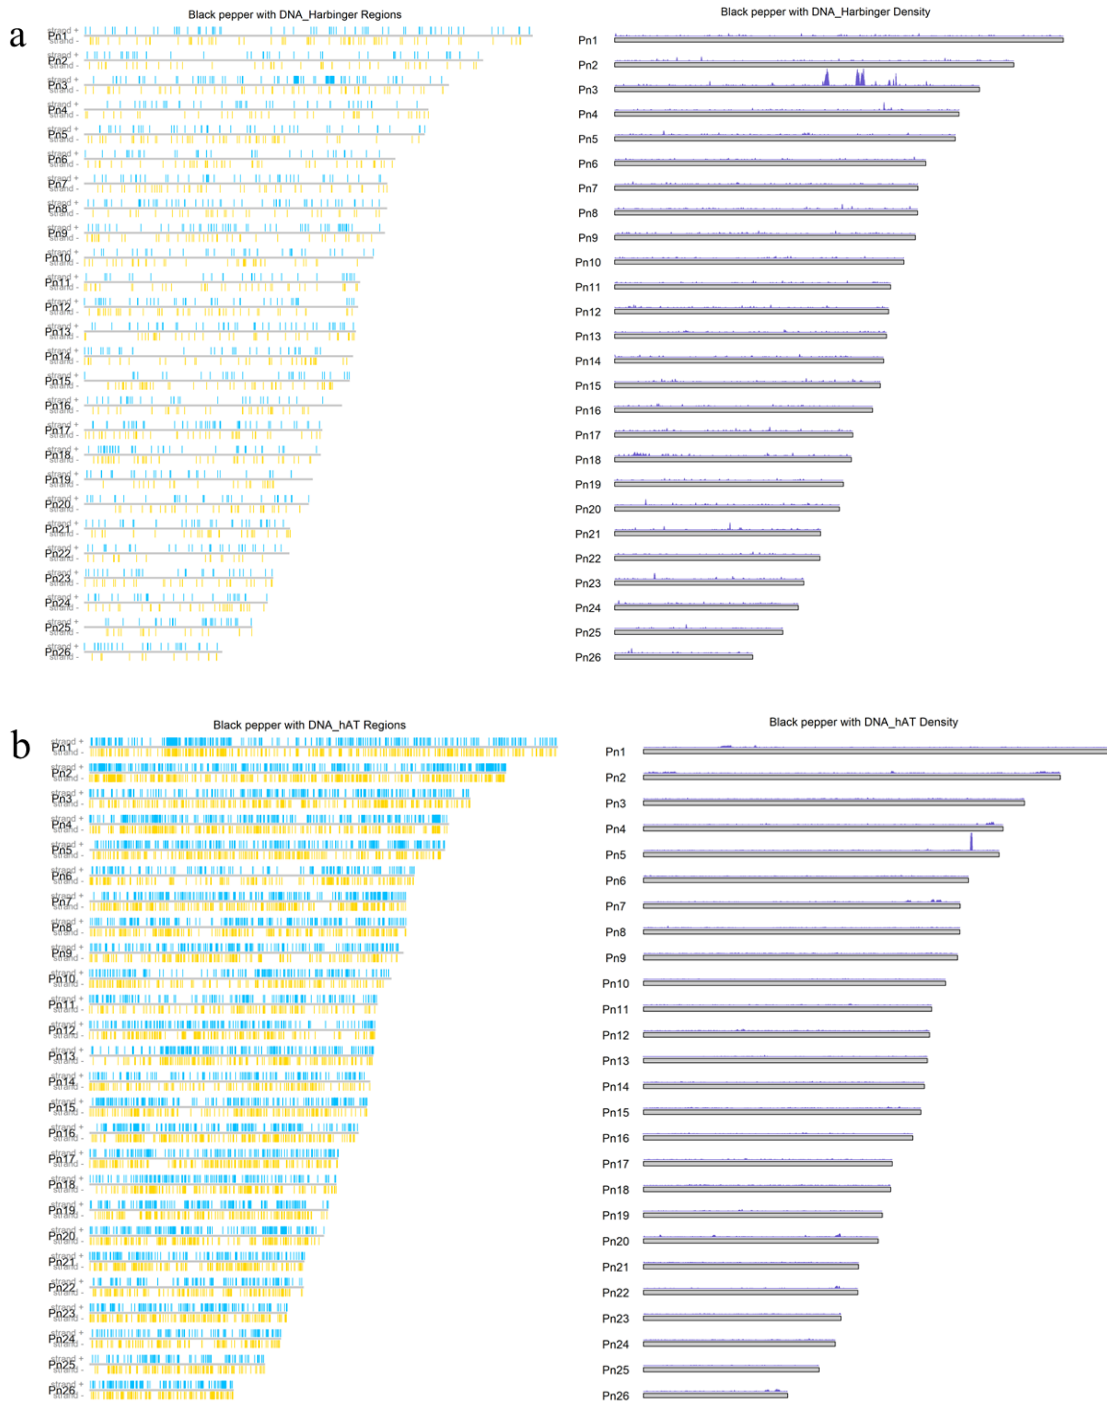

**Supplementary Figure 24. Repeat regions and density of the black pepper genome.**

(a) Repeat regions and density of Harbinger repeat sequences in the black pepper genome.

(b) Repeat regions and density of hAT repeat sequences in the black pepper genome.

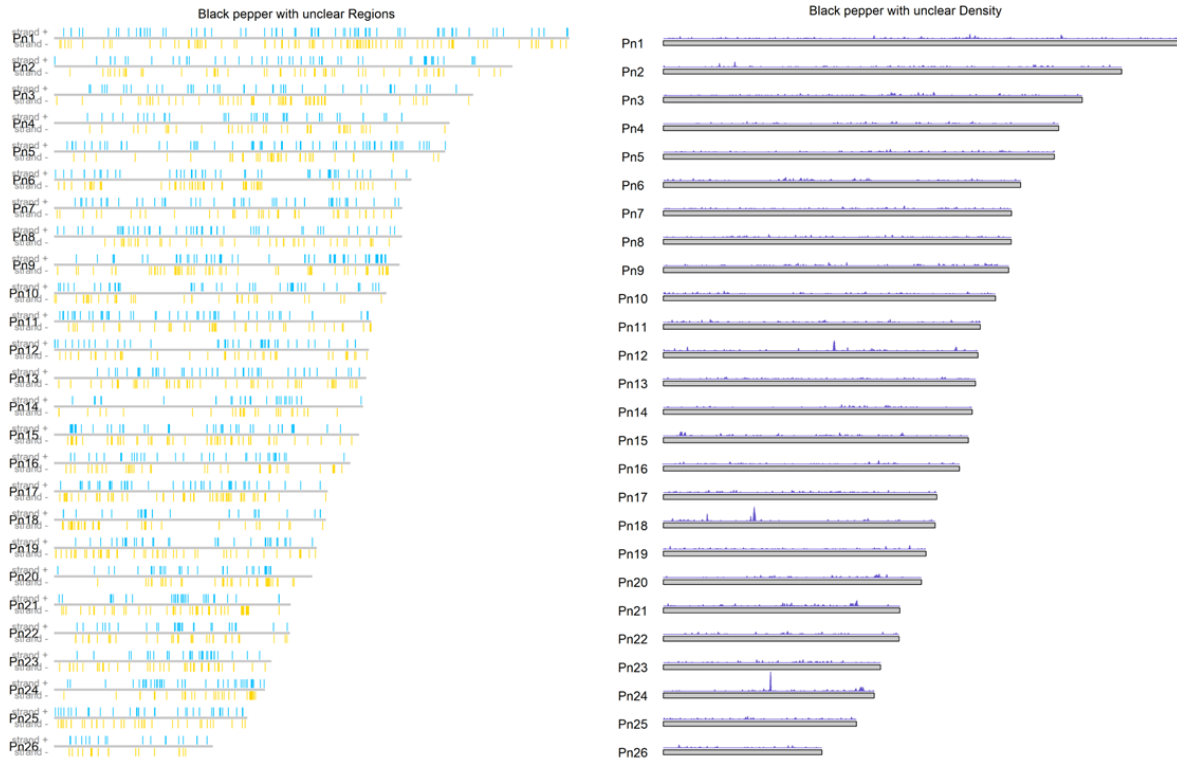

**Supplementary Figure 25. Repeat regions and density of the black pepper genome.**

Repeat regions and density of unclear repeat sequences in the black pepper genome.

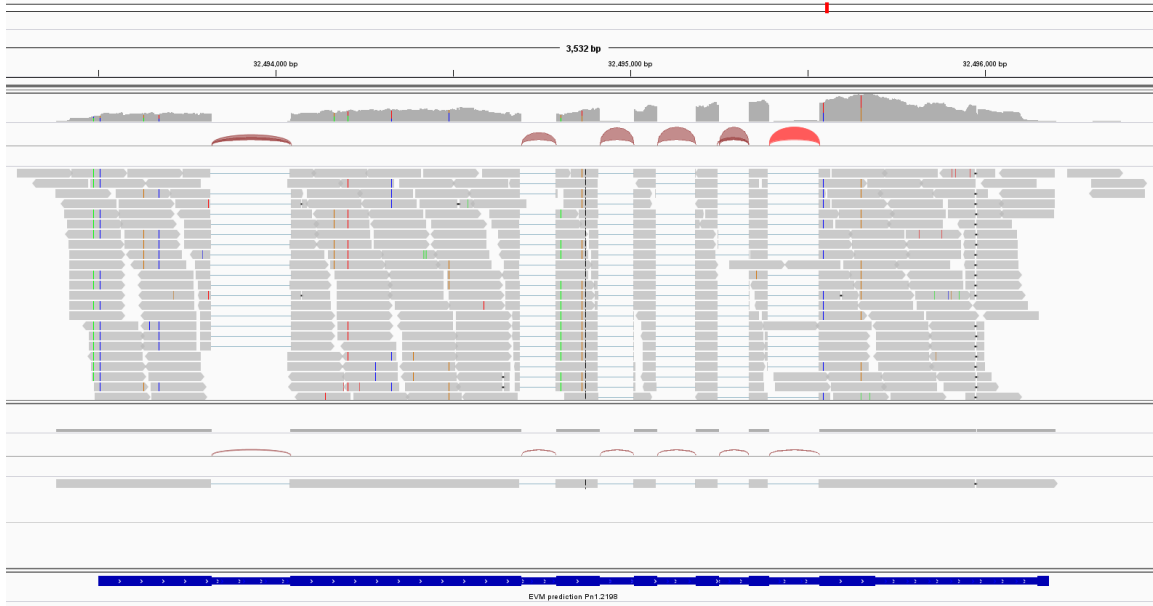

**Supplementary Figure 26. Black pepper genome annotation.** Representative gene model showing mapped RNA sequencing reads generated using Illumina or PacBio Iso-Seq sequencing technologies. The top and middle panels show RNA-seq reads and PacBio Iso-Seq sequencing, respectively, mapped to the chromosomal location containing the Pn1.2198 gene model, which is shown in the bottom panel.

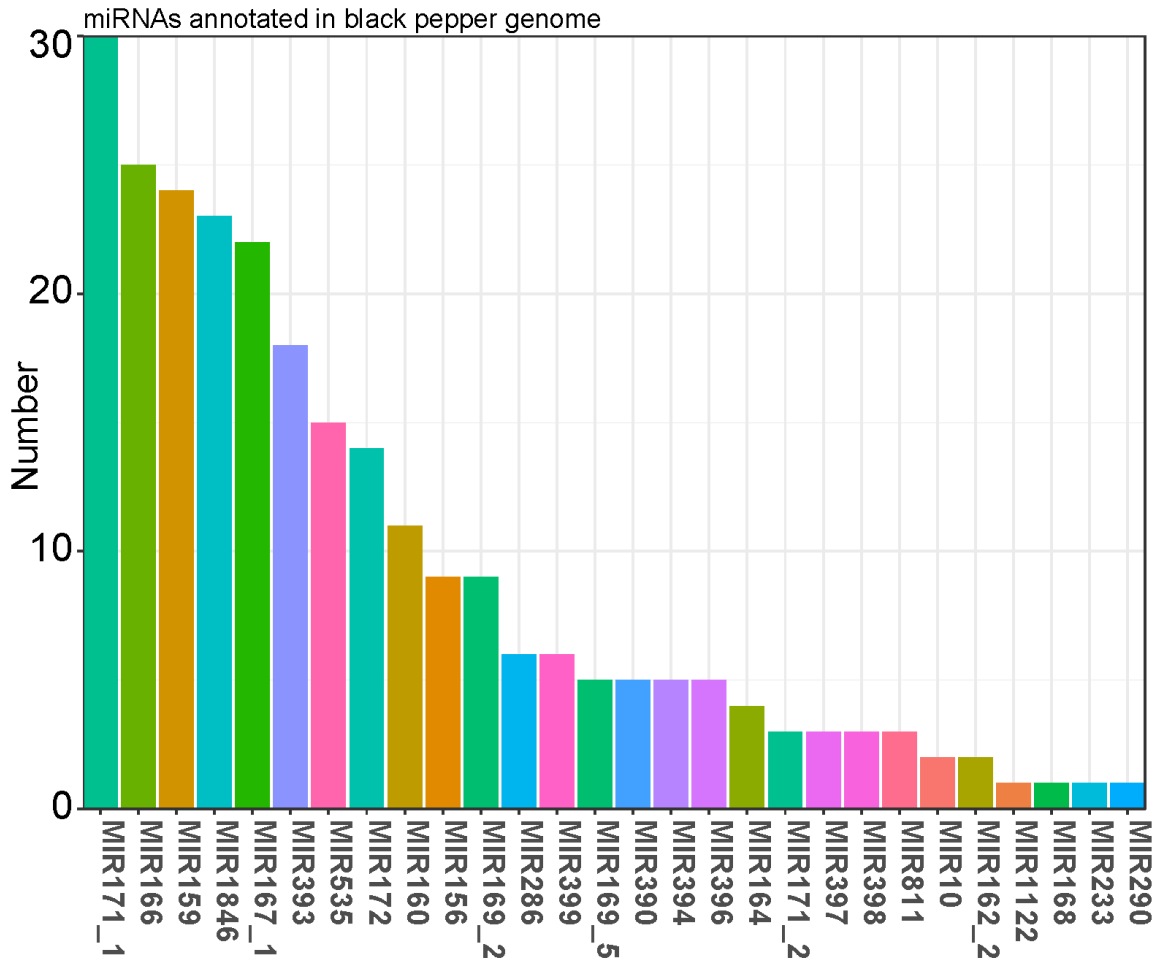

**Supplementary Figure 27. Distribution of annotated miRNAs in the black pepper genome.**

Gene Ontology (GO) component of black pepper genome

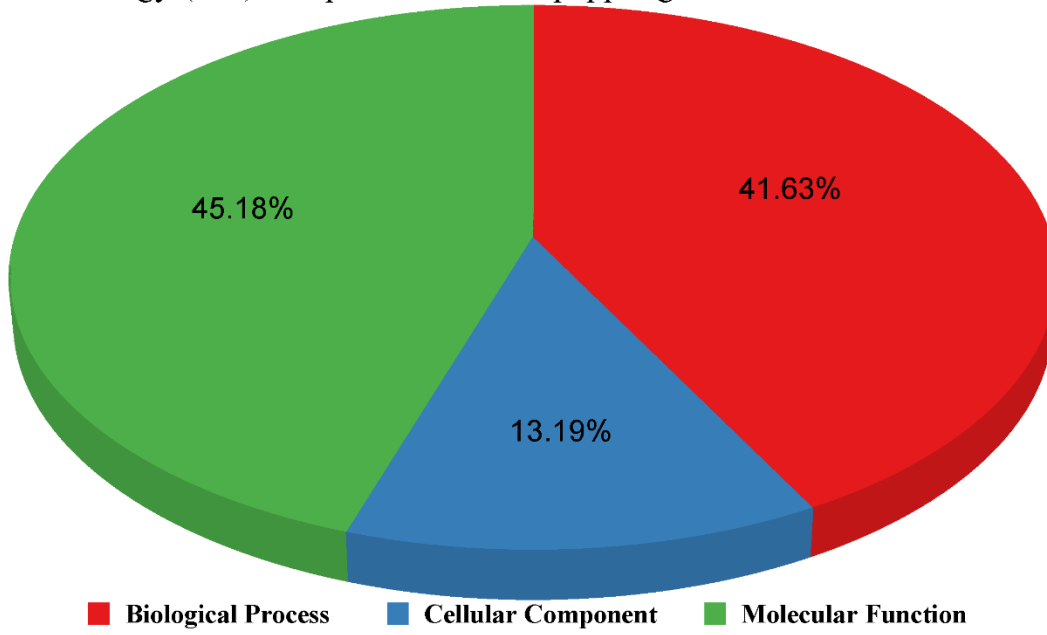

**Supplementary Figure 28. Gene Ontology distribution of annotated genes in the black pepper genome.**



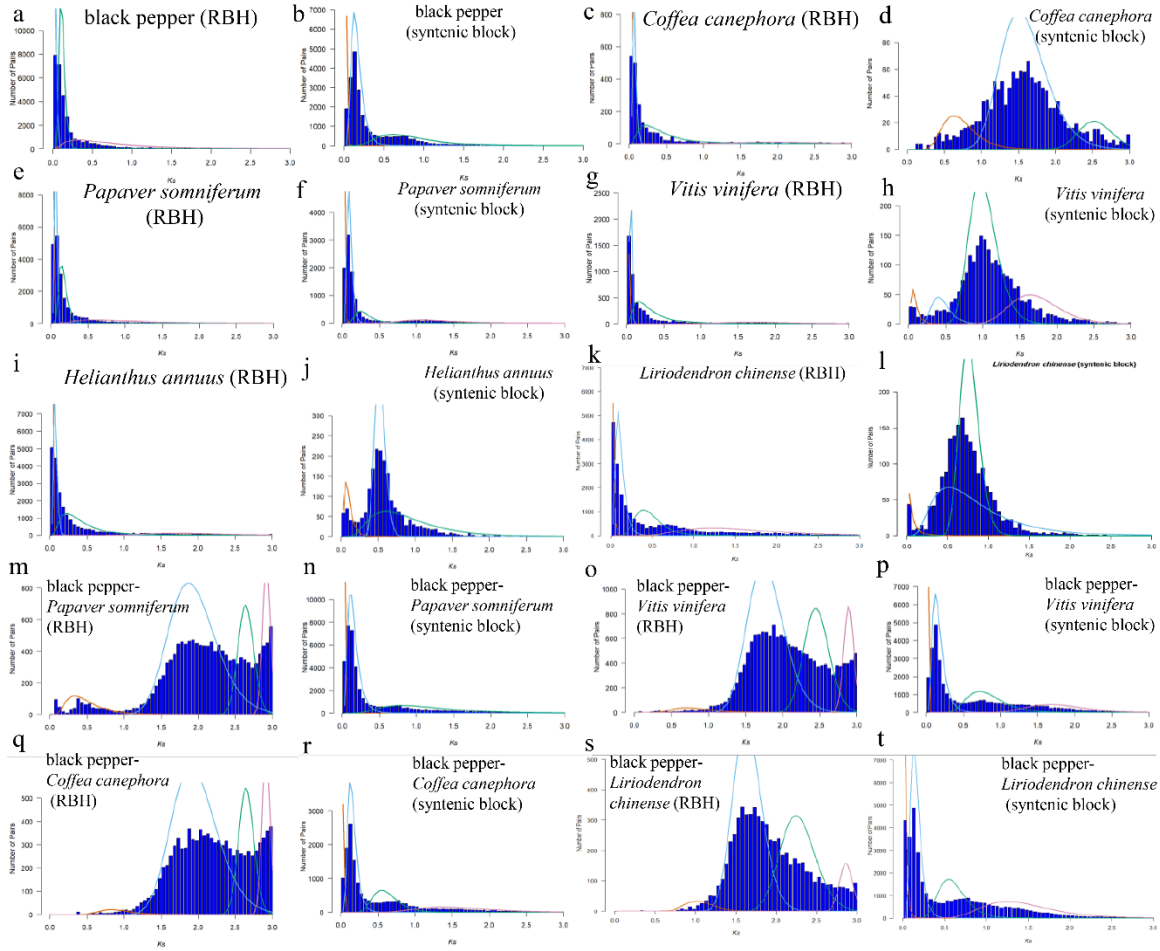

**Supplementary Figure 29. Histogram distribution of synonymous substitution rate for homologous gene pairs.** (a, c, e, g, i, k, m, o, q and s) Identified using the reciprocal best hit (RBH) analysis. (b, d, f, h, j, l, n, p, r and t) Syntenic block gene pairs identified with MCSanX analysis.

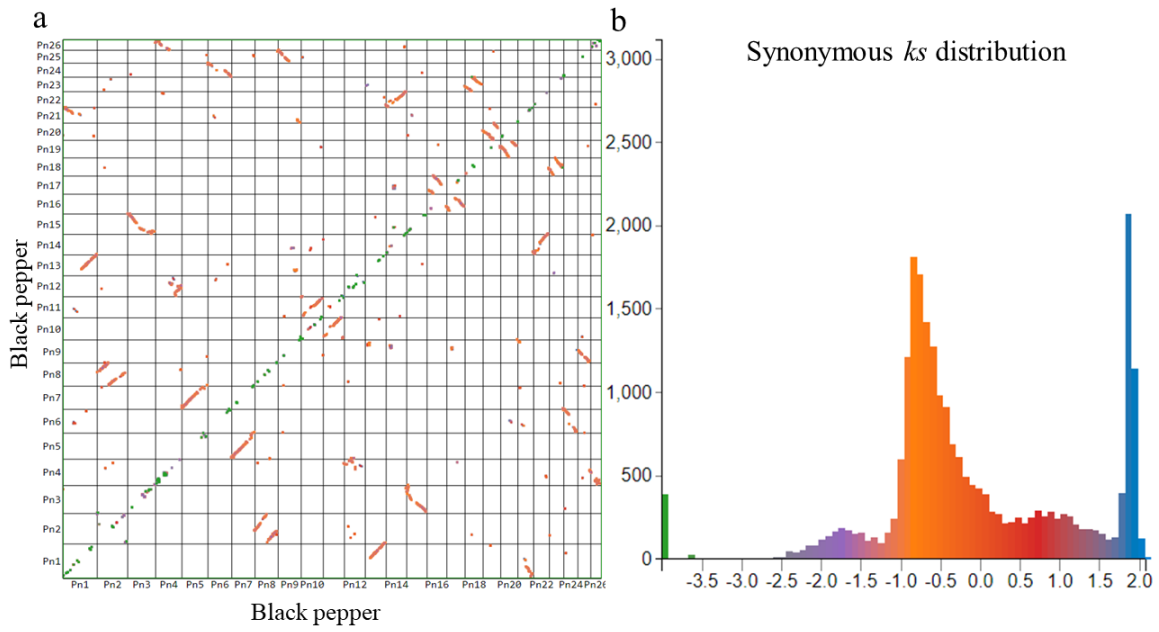

**Supplementary Figure 30. Synteny analysis within the black pepper genome.** (a) Dot plot matrix displaying the paralogs in black pepper. (b) Synonymous  $K_s$  distribution of paralogs genes in the black pepper genome.

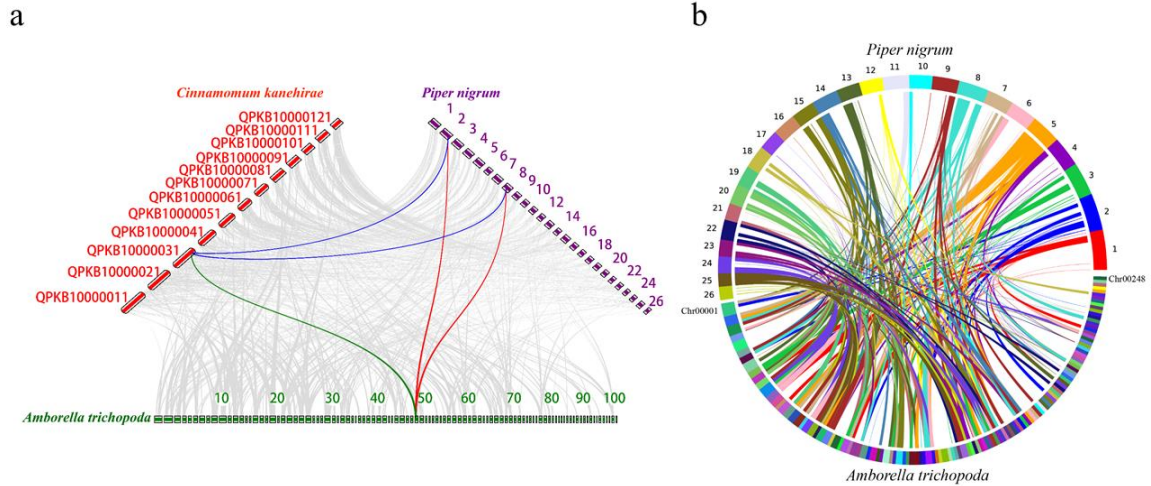

**Supplementary Figure 31. Synteny analysis of black pepper.** (a) Macrosynteny patterns show that a typical ancestral region in the basal angiosperm *Amborella* can be tracked to up to two regions in black pepper and to up to one region in *Cinnamomum micranthum*. Grey wedges in the background highlight major syntenic blocks spanning the genomes (highlighted by one syntenic set shown in colour). (b) Synteny of black pepper and *Amborella trichopoda* genomes.

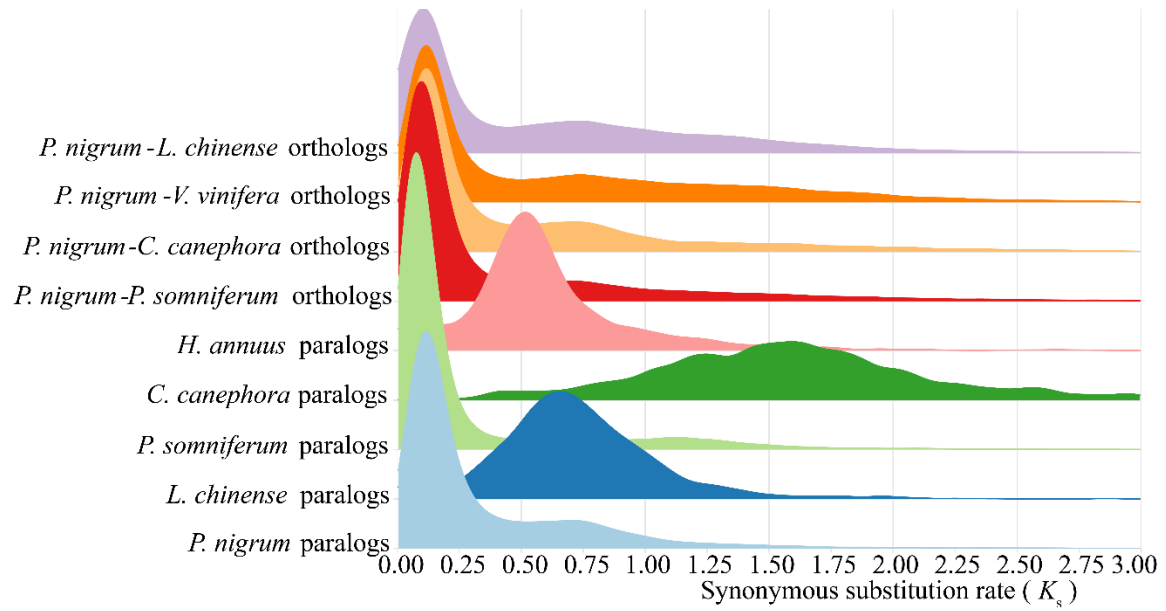

**Supplementary Figure 32. Synonymous substitution rate distribution of syntenic**

**block gene pair.** All is identified using MCScanX analysis in different species.

Genes families showing expansion and Contraction in Magnoliidae

Species ■ *Cinnamomum kanehirae* ■ *Liriodendron chinense* ■ *Persea americana* ■ *Piper nigrum*

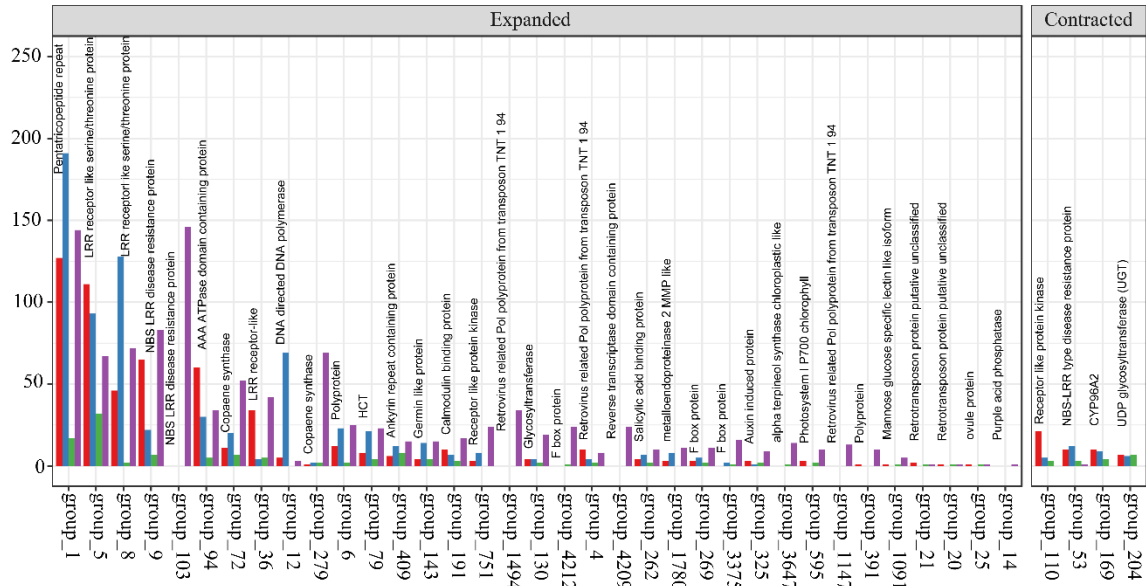

**Supplementary Figure 33. Gene family expansion and contraction in the**

**Magnoliidae.** The text over the bar indicates the function of corresponding gene family.

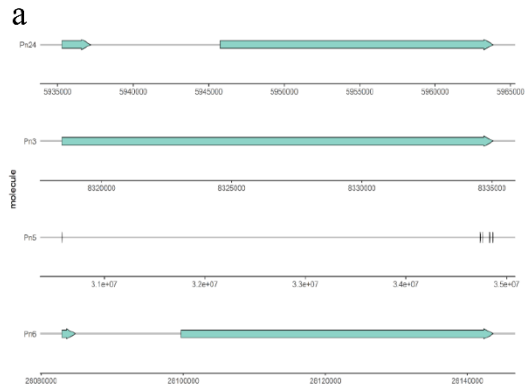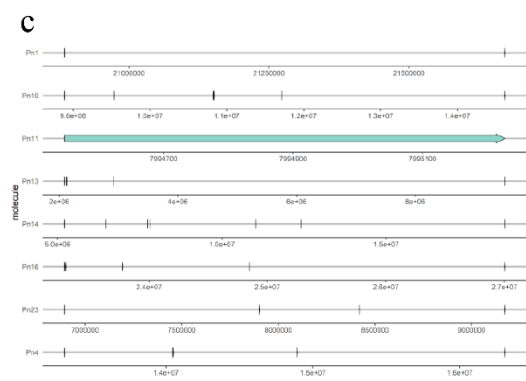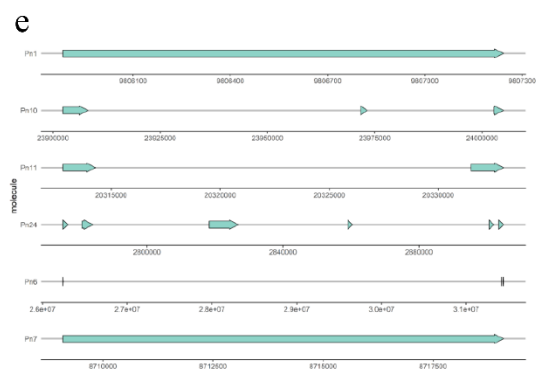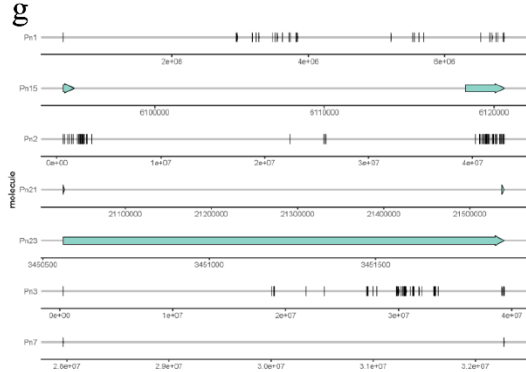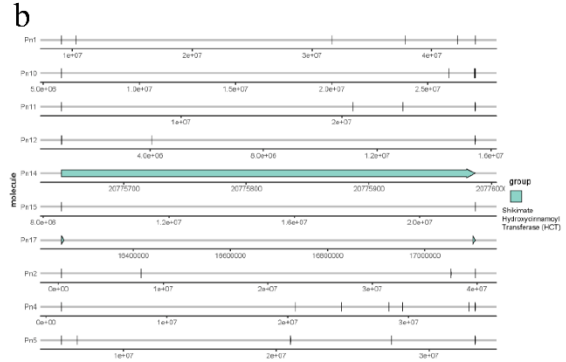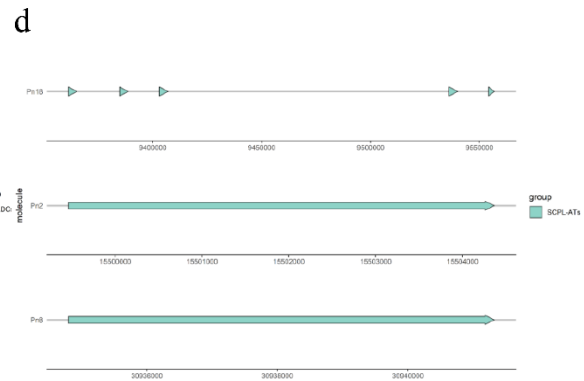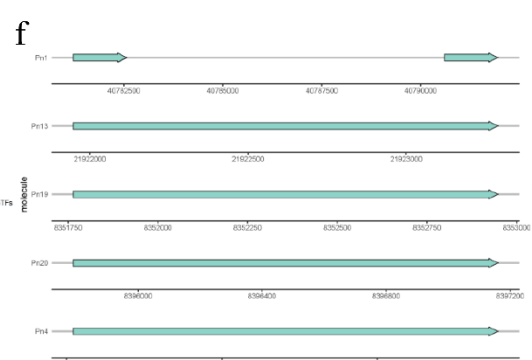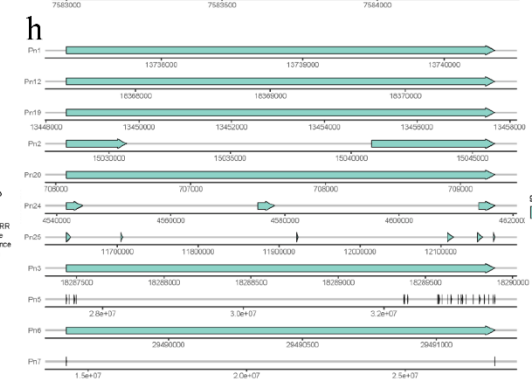

**Supplementary Figure 34. Arrangement and chromosomal position of expanded genes in black pepper.** (a-f) Secondary metabolism-associated genes. and (g and h) Disease resistance-associated genes.

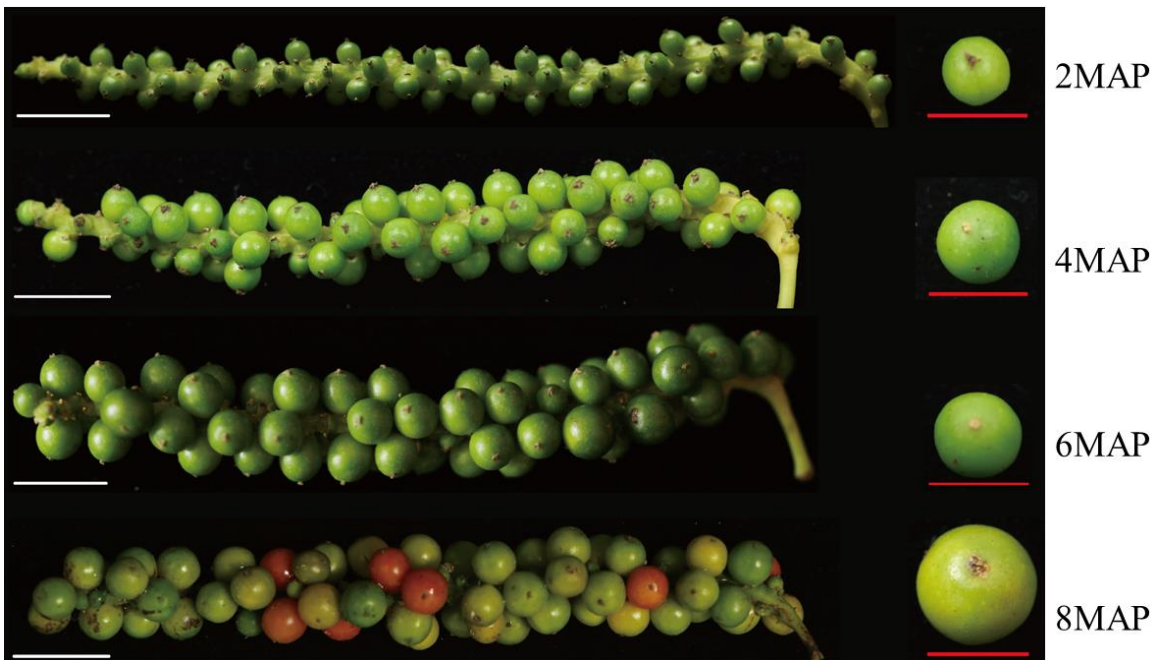

**Supplementary Figure 35. Picture of black pepper berry at different developmental stages.** White bar = 1 cm and red bar = 0.5 cm. All the images are taken from black pepper that was sequenced, and was grown at the Spice and Beverage Research Institute, Chinese Academy of Tropical Agricultural Sciences.

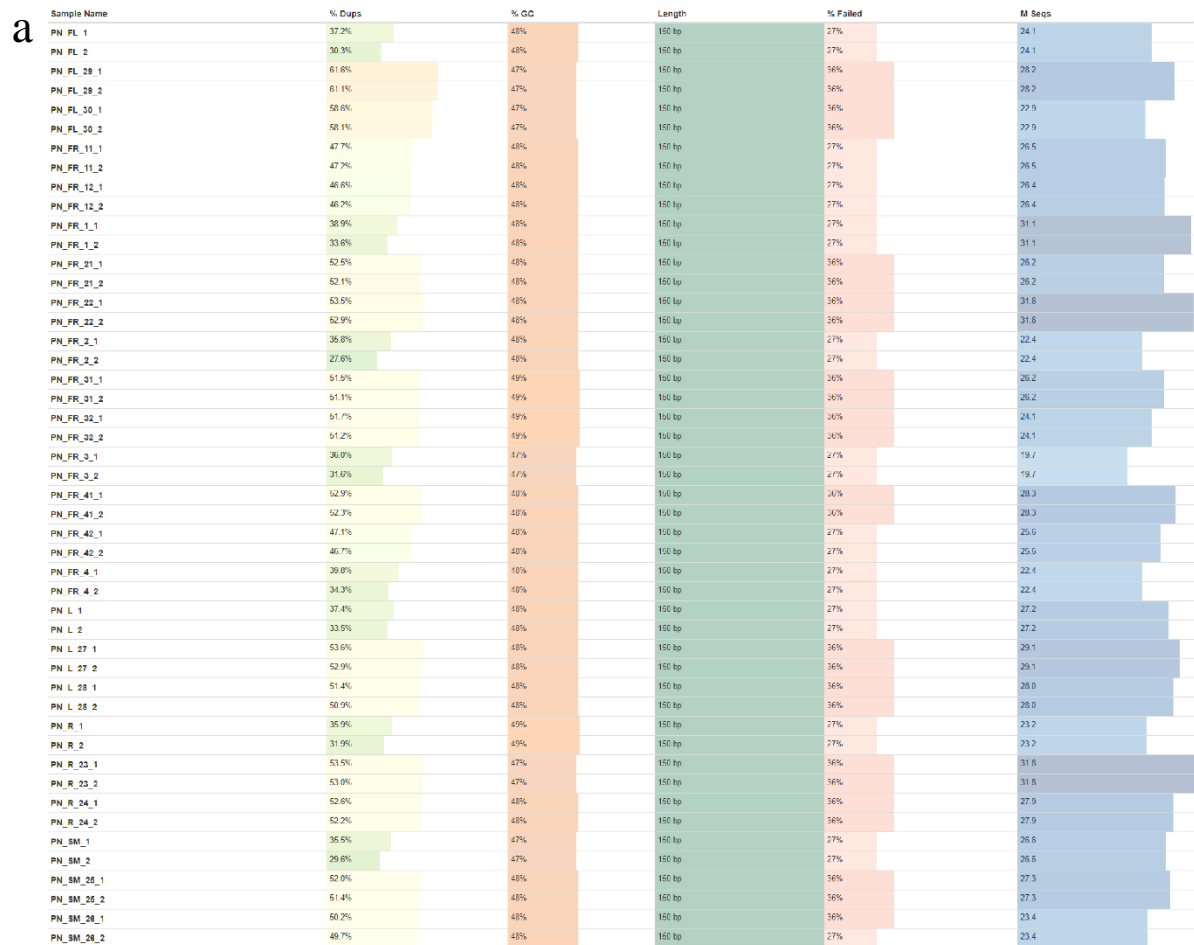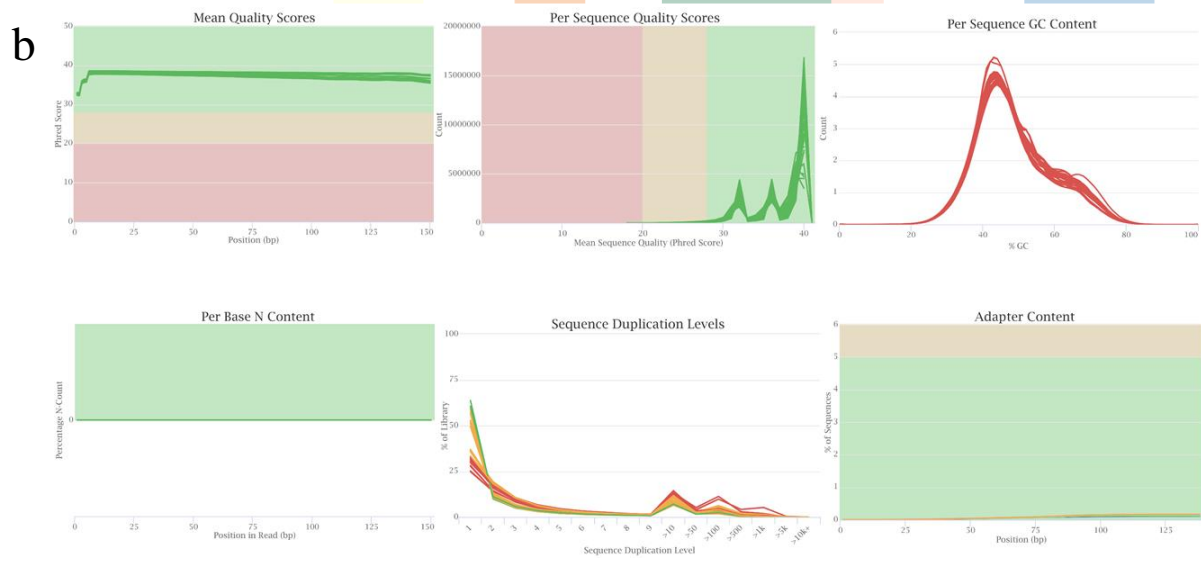

**Supplementary Figure 36. Quality checks of RNA-seq data.** (a) Statistical analysis of duplicate reads, average GC content and total sequences in RNA-seq data obtained from black pepper. (b) Distribution of sequence quality, N content, duplication levels and adapter content in RNA-seq data from black pepper.



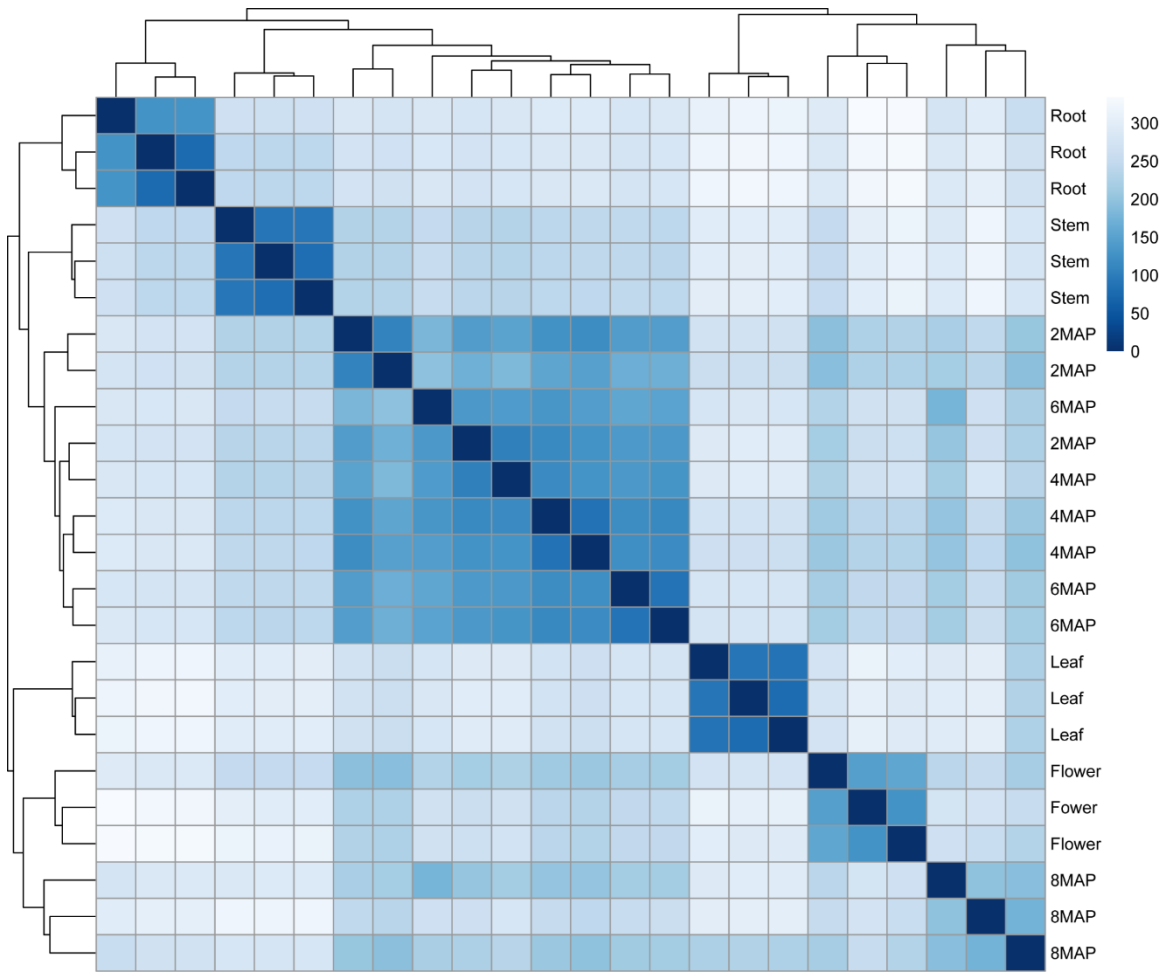

**Supplementary Figure 37. Correlation of RNA-seq data in different tissues from black pepper.**

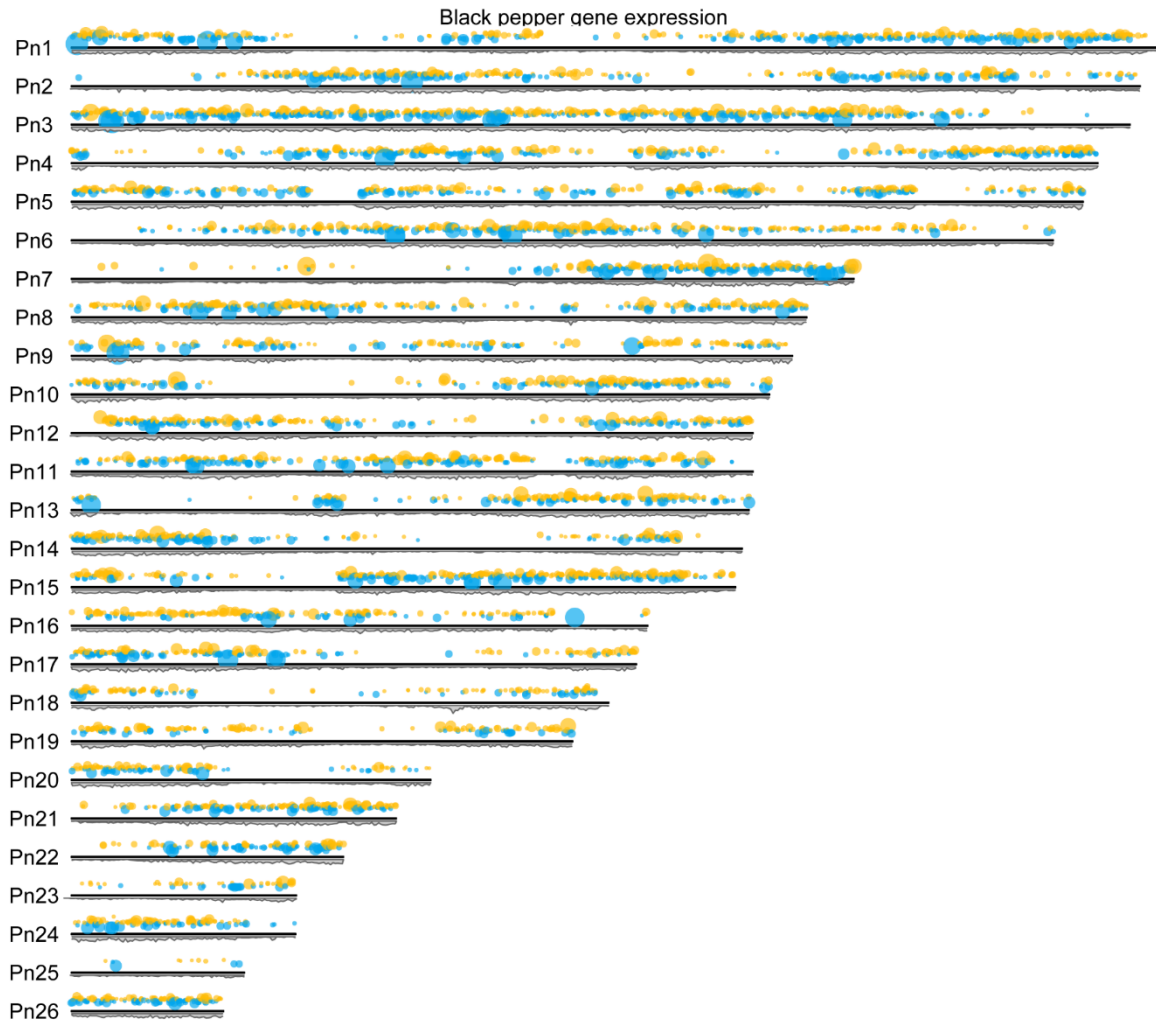

**Supplementary Figure 38. The chromosome distribution of differentially expressed genes in berry and other tissues.** The distribution of points is based on the log<sub>2</sub> fold change and the size represents the p-value. The colours indicated up- (yellow) and under-expressed (cyan) expression genes.

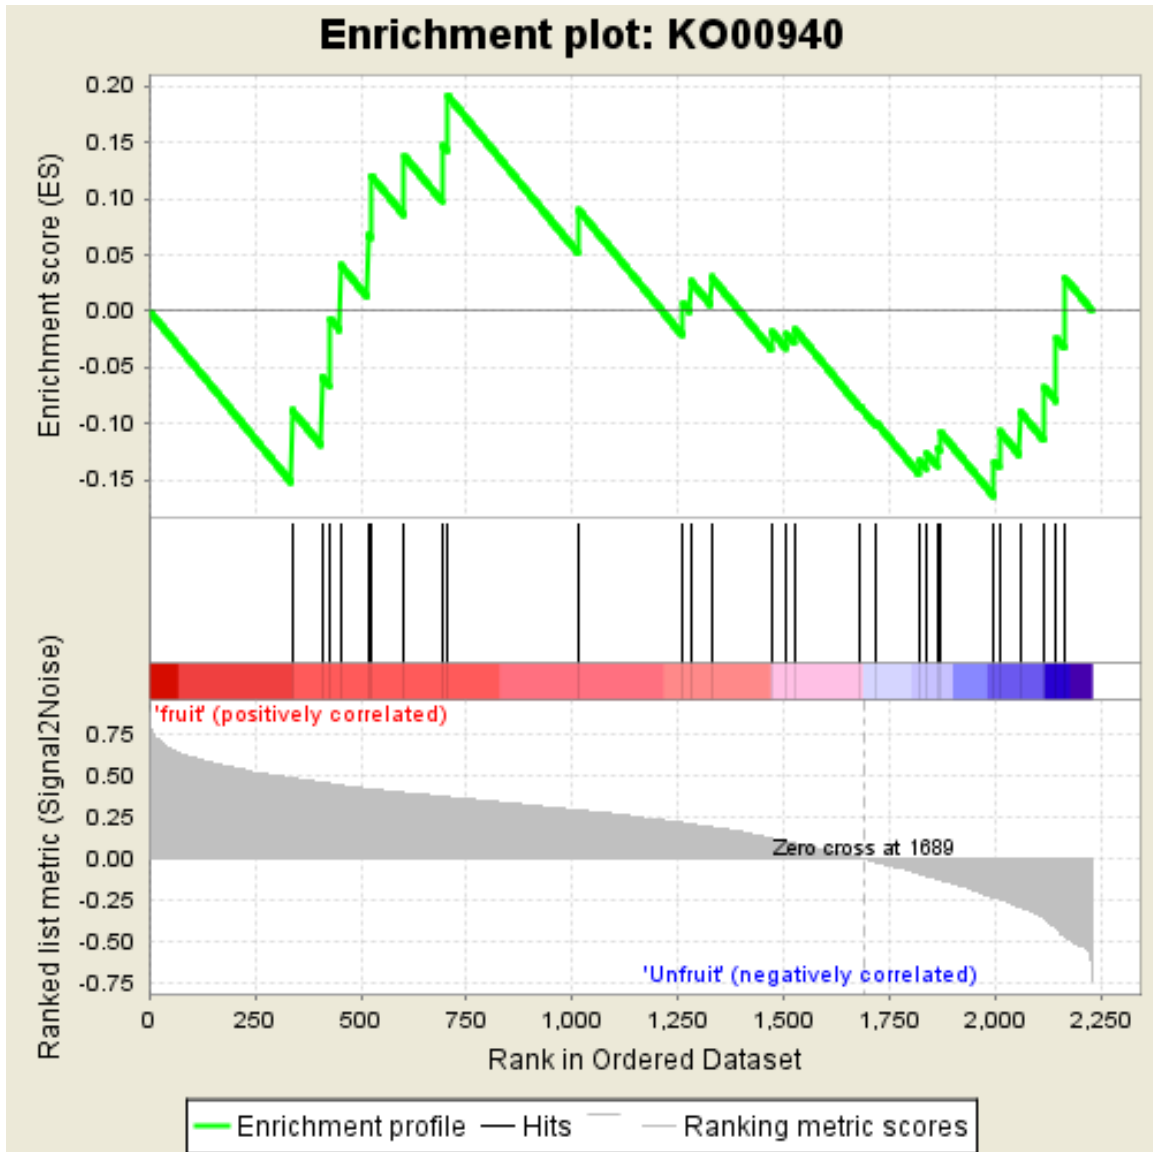

**Supplementary Figure 39. Gene set enrichment analysis of the phenylpropanoid pathway in black pepper genome.** Following the calculation of the enrichment score (ES), the enrichment plot illustrates specific gene sets associated with the differences between fruit and non-fruit tissues.

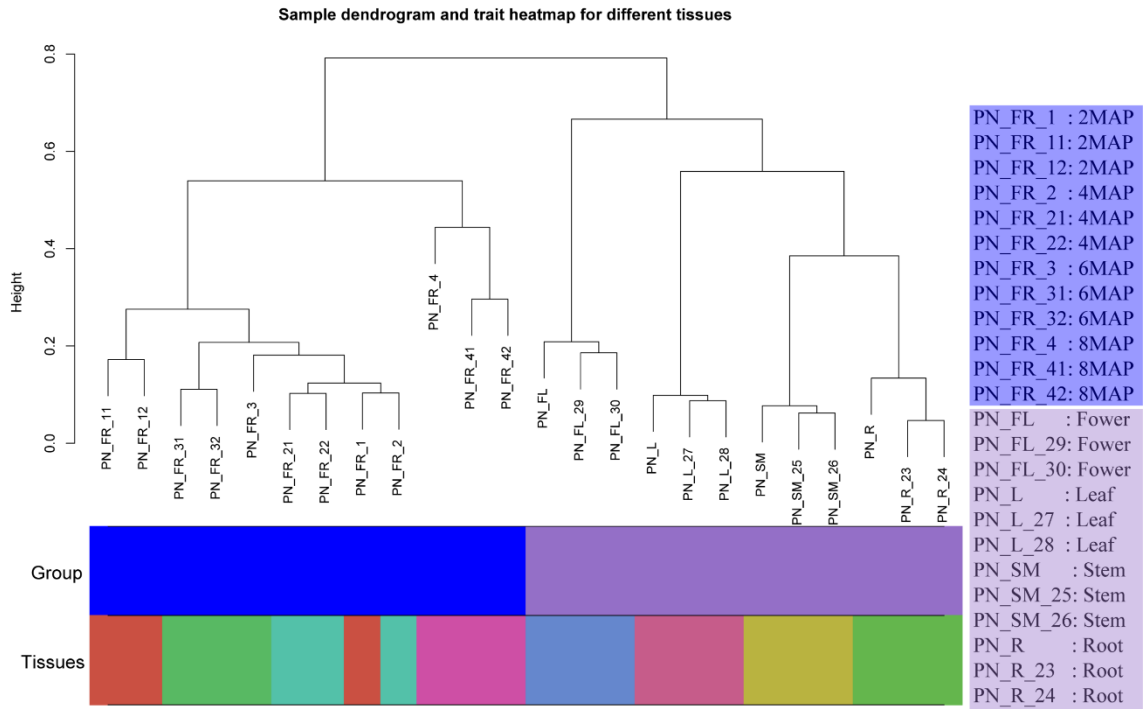

**Supplementary Figure 40. Sample dendrogram and trait heatmap for different tissues from the WGCNA.** Each colour in the dendrogram indicates one tissue.

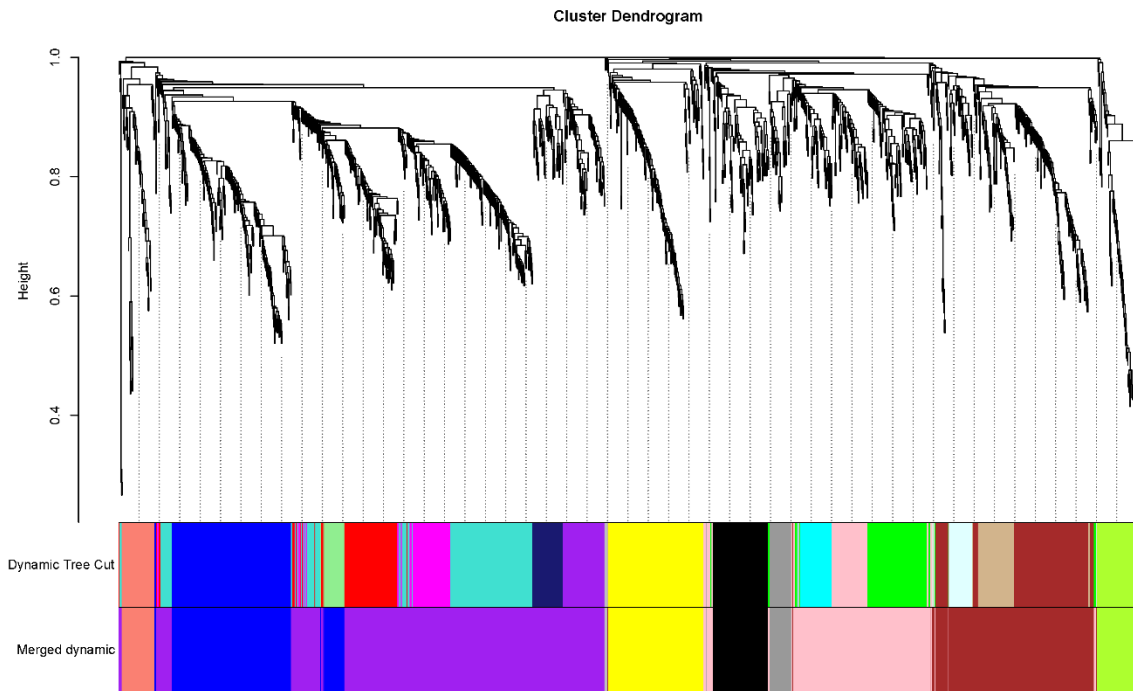

**Supplementary Figure 41. Clustering dendrogram of genes together with assigned merged module colours and the original module colours.** The different colours under the dendrogram show co-expressed modules identified using WGCNA.

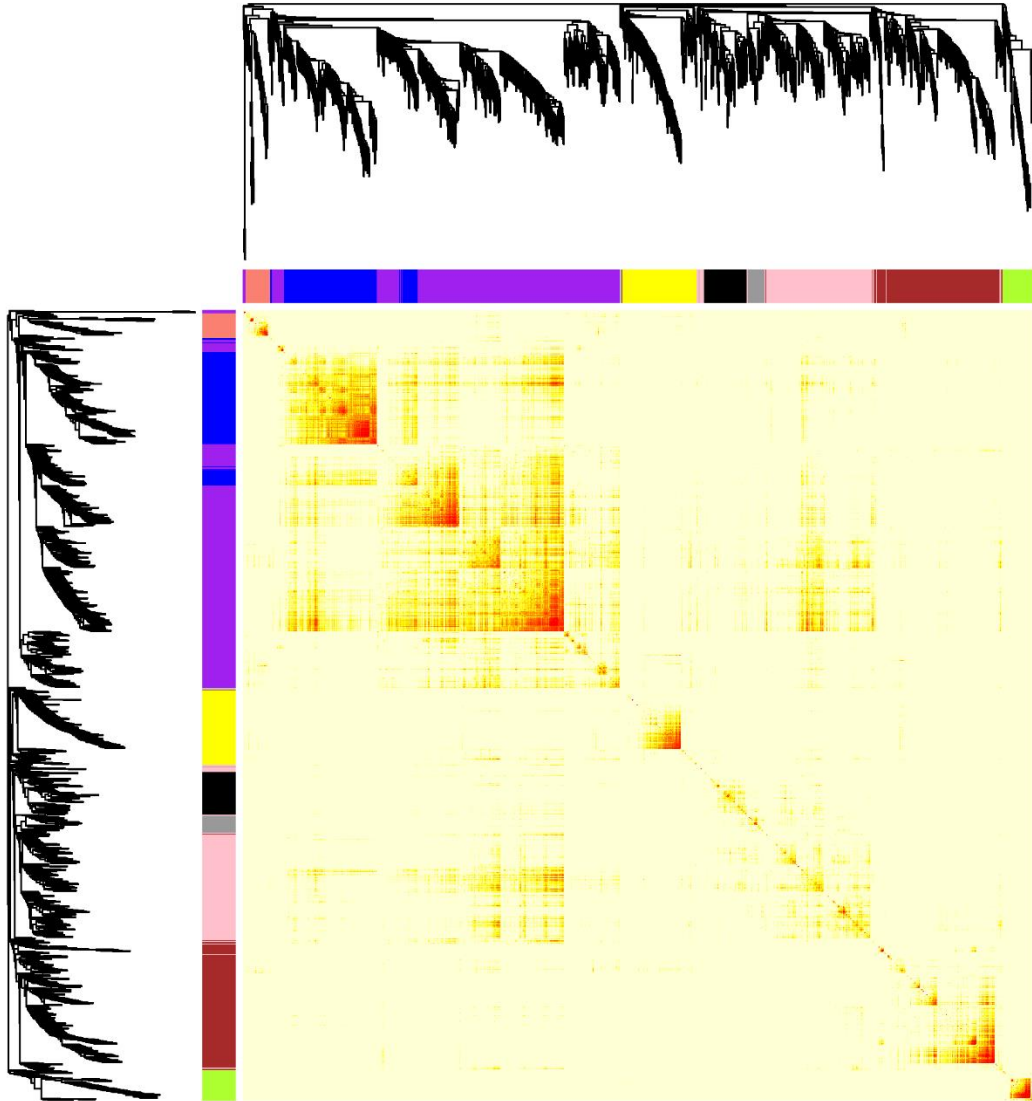

**Supplementary Figure 42. Heatmap of the gene network using Topological Overlap Matrix among all genes identified from different tissues.** The left side and the top represent the gene dendrogram and module. The colour bar that next to the dendrogram shows the co-expressed modules.

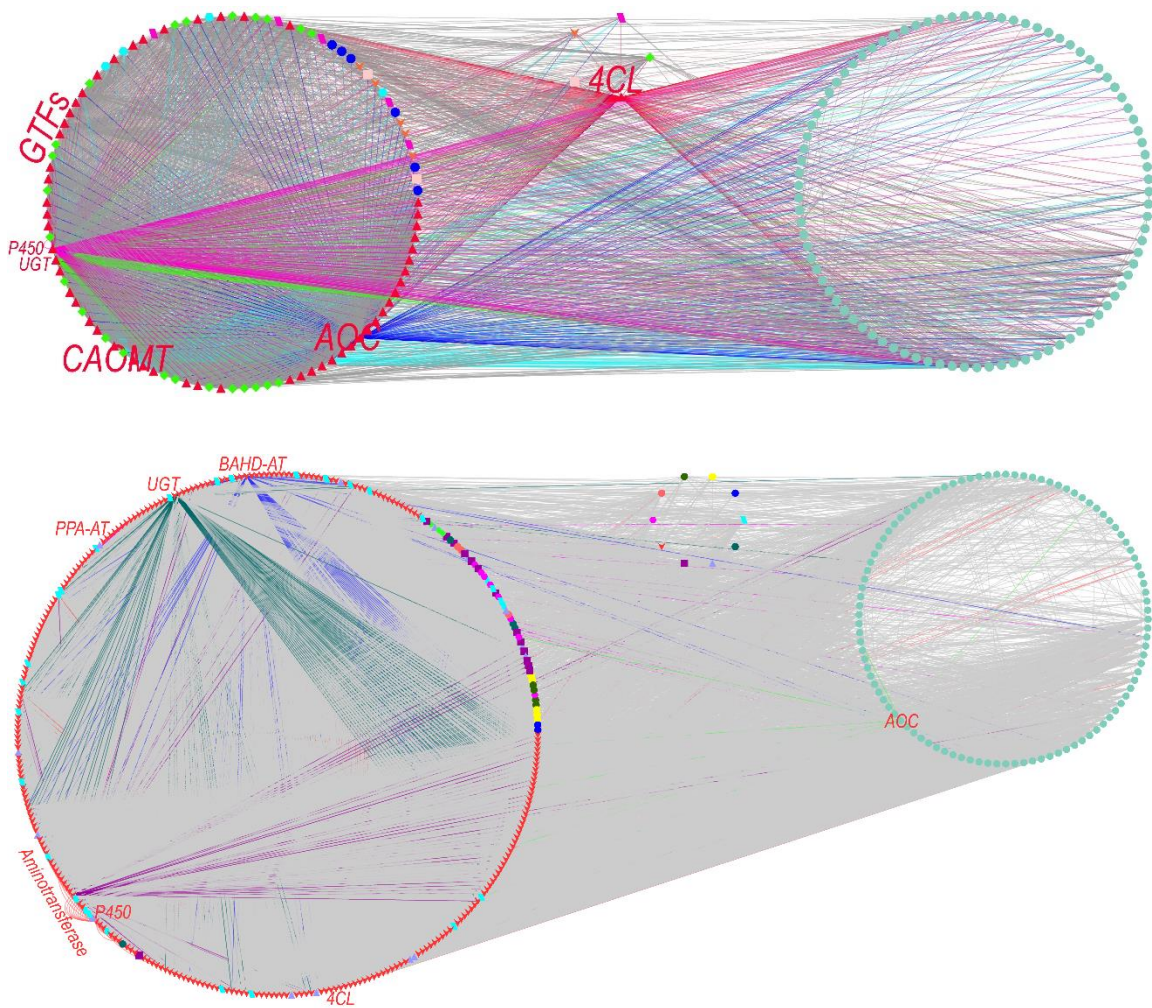

**Supplementary Figure 43. Co-regulatory network shows genes that participate in piperine biosynthesis in black pepper.** The nodes presented in different colour and shapes were used to distinguish clusters with highly interconnected regions in the network. Lines in different colours indicate the connections with specific genes.

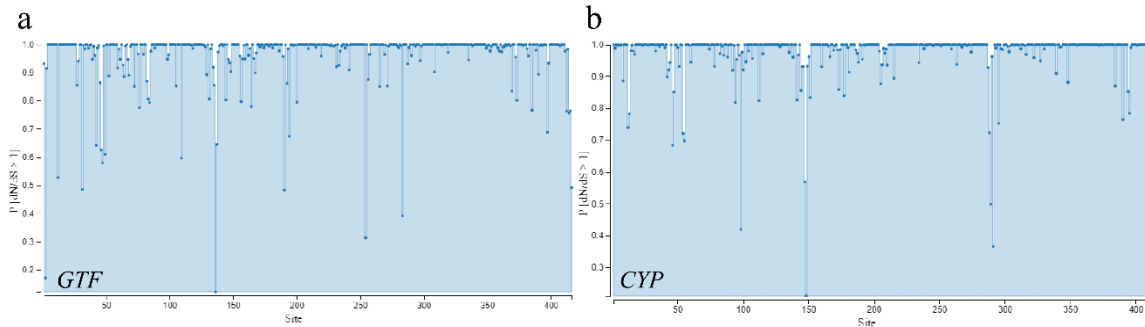

**Supplementary Figure 44. SLAC site graph.** The p-value of  $dN/dS > 1$  obtained using the SLAC method across the alignment of *GTF* (a) and *CYP* (b) sequences. Sites indicate statistically significant evidence for codons under selection when  $p[dN/dS > 1] < 0.1$ .

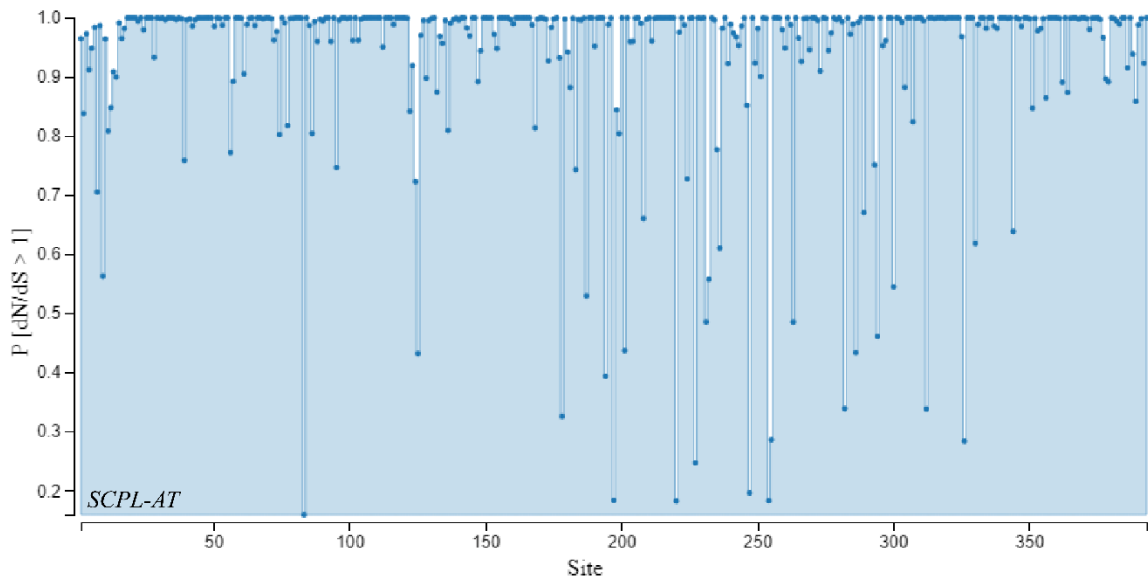

**Supplementary Figure 45. SLAC site graph.** The p-value of  $dN/dS > 1$  obtained using the SLAC (single-likelihood ancestor counting) method across the alignment of *SCPL-AT* sequences. Sites indicate statistically significant evidence for codons under selection when  $p[dN/dS > 1] < 0.1$ .



1 **Supplementary Table 1. Genome survey of black pepper.**

| <b>K-mer</b> | <b>K-mer number</b> | <b>K-mer<br/>Depth</b> | <b>Genome Size<br/>(Mb)</b> | <b>Revised Genome Size<br/>(Mb)</b> | <b>Heterozygous<br/>Retio (%)</b> | <b>Repeat (%)</b> |
|--------------|---------------------|------------------------|-----------------------------|-------------------------------------|-----------------------------------|-------------------|
| 17           | 78,519,660,276      | 101                    | 777.42                      | 761.74                              | 1.33                              | 59.54             |

2 **Supplementary Table 2. BioNano molecule quality report.**

---

| <b>Molecule Quality Report</b>  |            |
|---------------------------------|------------|
| Enzyme                          | DLE-1      |
| Molecules Number                | 3,336,606  |
| Total Length (Mb)               | 316,350.85 |
| Quantity (Gb)                   | 177.3      |
| Avg. N50 (Kb) (>=150 Kb)        | 266        |
| Avg. N50 (Kb) (>=20 Kb)         | 176        |
| Avg. Label Density (per 100 Kb) | 14.21      |
| Avg. Map Rate (%)               | 50.60%     |
| Estimated Effective Coverage    | 128X       |
| Avg. False Positive             | 7.74%      |
| Avg. False Negative             | 11.42%     |

---

3

4

5

6

7

8

9

10

11 **Supplementary Table 3. Hi-C data quality report.**

| <b>Truncating and Mapping</b>                     |                     |                       |
|---------------------------------------------------|---------------------|-----------------------|
|                                                   | <b>Read 1</b>       | <b>Read 2</b>         |
| Total Reads                                       | 354,073,485         | 354,073,485           |
| Not Truncated                                     | 186,364,059         | 190,021,708           |
| Truncated                                         | 167,709,426         | 164,051,777           |
| Too short to map                                  | 8,001,178           | 8,158,149             |
| Average length of truncated sequence              | 76.99               | 76.51                 |
| Unique Alignments                                 | 261,779,237         | 259,465,003           |
| Multiple Alignments                               | 64,842,355          | 63,992,019            |
| Failed To Align                                   | 19,450,715          | 22,458,314            |
| <b>Filtering</b>                                  |                     |                       |
|                                                   | <b>Di-Tag Count</b> |                       |
| Valid Pairs                                       | 166,420,467         |                       |
| Invalid Pairs                                     | 21,894,375          |                       |
| Same Circularised                                 | 1,215,285           |                       |
| Same Fragment Dangling Ends                       | 154,806             |                       |
| Same Fragment Internal                            | 1,834,879           |                       |
| Re-ligation                                       | 3,144,692           |                       |
| Contiguous Sequence                               | 289,115             |                       |
| Total Pairs                                       | 188,314,842         |                       |
| <b>De-duplication (Percentage uniques: 74.95)</b> |                     |                       |
|                                                   | <b>All Di-Tags</b>  | <b>Unique Di-Tags</b> |
| Read Pairs                                        | 166,420,467         | 124,737,933           |
| Cis-close (< 10Kb)                                | 9,548,381           | 7,120,094             |
| Cis-far (> 10Kb)                                  | 60,670,406          | 45,235,721            |
| Trans                                             | 96,201,680          | 72,382,118            |

12

13 **Supplementary Table 4. Statistics of completeness of the black pepper genome based**  
 14 **on 248 CEGs.**

| <b>Complete Match</b> |              |                      |              |                |               |
|-----------------------|--------------|----------------------|--------------|----------------|---------------|
|                       | <b>Prots</b> | <b>%Completeness</b> | <b>Total</b> | <b>Average</b> | <b>%Ortho</b> |
| Complete              | 234          | 94.35                | 640          | 2.74           | 78.63         |
| Group 1               | 62           | 93.94                | 145          | 2.34           | 69.35         |
| Group 2               | 51           | 91.07                | 120          | 2.35           | 64.71         |
| Group 3               | 57           | 93.44                | 165          | 2.89           | 87.72         |
| Group 4               | 64           | 98.46                | 210          | 3.28           | 90.62         |
| <b>Partial Match</b>  |              |                      |              |                |               |
| Total                 | 244          | 98.39                | 738          | 3.02           | 85.25         |
| Group 1               | 64           | 96.97                | 166          | 2.59           | 78.12         |
| Group 2               | 54           | 96.43                | 147          | 2.72           | 75.93         |
| Group 3               | 61           | 100.00               | 192          | 3.15           | 91.80         |
| Group 4               | 65           | 100.00               | 233          | 3.58           | 93.85         |

15 # These results are based on the set of genes selected by Genis Parra #

16 # Key:

17 Prots = number of 248 ultra-conserved CEGs present in genome

18 %Completeness = percentage of 248 ultra-conserved CEGs present

19 Total = total number of CEGs present including putative orthologs

20 Average = average number of orthologs per CEG

21 %Ortho = percentage of detected CEGS that have more than 1 ortholog

22 # Listing missing proteins in each category

23 # Category: Complete

24 KOG0018      KOG0062      KOG0209      KOG0346

25 KOG0376      KOG0434      KOG0741      KOG0969

26 KOG1272      KOG1795      KOG1889      KOG1936

27 KOG2036      KOG2311

28 # Category: Partial

29 KOG0062      KOG0346      KOG0376      KOG1889

30 **Supplementary Table 5. Report of BUSCO results for the black pepper genome.**

---

C:96.1%[S:77.0%,D:19.1%],F:1.2%,M:2.7%,n:430

---

|     |                                     |
|-----|-------------------------------------|
| 413 | Complete BUSCOs (C)                 |
| 331 | Complete and single-copy BUSCOs (S) |
| 82  | Complete and duplicated BUSCOs (D)  |
| 5   | Fragmented BUSCOs (F)               |
| 12  | Missing BUSCOs (M)                  |
| 430 | Total BUSCO groups searched         |

---

31

32

33

34

35

36

37

38

39

40

41

42

43 **Supplementary Table 6. Pfam protein domain models used in LTR**  
 44 **retrotransposon/retrovirus-specific domains analysis.**

| <b>Pfam accession#</b> | <b>Pfam ID</b>  | <b>Description</b>                                  |
|------------------------|-----------------|-----------------------------------------------------|
| PF00067                | p450            | Cytochrome P450                                     |
| PF00069                | Pkinase         | Protein kinase domain                               |
| PF00075                | RNase_H         | RNase H                                             |
| PF00076                | RRM_1           | RNA recognition motif                               |
| PF00098                | zf-CCHC         | Zinc knuckle                                        |
| PF00153                | Mito_carr       | Mitochondrial carrier                               |
| PF00385                | Chromo          | Chromo (CHRromatin Organisation<br>MOfifier) domain |
| PF00628                | PHD             | PHD-finger                                          |
| PF01344                | Kelch_1         | Kelch motif                                         |
| PF01348                | Intron_maturas2 | Type II intron maturase                             |
| PF01824                | MatK_N          | MatK/TrnK amino terminal region                     |
| PF02160                | Peptidase_A3    | Cauliflower mosaic virus peptidase (A3)             |
| PF03078                | ATHILA          | ATHILA ORF-1 family                                 |
| PF03107                | C1_2            | C1 domain                                           |
| PF03357                | Snf7            | Snf7                                                |
| PF03463                | eRF1_1          | eRF1 domain 1                                       |
| PF03464                | eRF1_2          | eRF1 domain 2                                       |
| PF03465                | eRF1_3          | eRF1 domain 3                                       |
| PF03732                | Retrotrans_gag  | Retrotransposon gag protein                         |
| PF04094                | DUF390          | Protein of unknown function (DUF390)                |
| PF04146                | YTH             | YTH protein domain                                  |
| PF04195                | Transposase_28  | Putative gypsy type transposon                      |
| PF04578                | DUF594          | Protein of unknown function, DUF594                 |
| PF04852                | DUF640          | Protein of unknown function (DUF640)                |
| PF04937                | DUF659          | Protein of unknown function (DUF 659)               |
| PF05699                | Dimer_Tnp_hAT   | hAT family C-terminal dimerisation region           |
| PF05970                | PIF1            | PIF1-like helicase                                  |

| <b>Pfam accession#</b> | <b>Pfam ID</b>  | <b>Description</b>                                        |
|------------------------|-----------------|-----------------------------------------------------------|
| PF06886                | TPX2            | Targeting protein for Xklp2                               |
| PF07279                | DUF1442         | Protein of unknown function (DUF1442)                     |
| PF07727                | RVT_2           | Reverse transcriptase (RNA-dependent DNA polymerase)      |
| PF08022                | FAD_binding_8   | FAD-binding domain                                        |
| PF08284                | RVP_2           | Retroviral aspartyl protease                              |
| PF10551                | MULE            | MULE transposase domain                                   |
| PF12776                | Myb_DNA-bind_3  | Myb/SANT-like DNA-binding domain                          |
| PF13359                | DDE_Tnp_4       | DDE superfamily endonuclease                              |
| PF13456                | RVT_3           | Reverse transcriptase-like                                |
| PF13837                | Myb_DNA-bind_4  | Myb/SANT-like DNA-binding domain                          |
| PF13912                | zf-C2H2_6       | C2H2-type zinc finger                                     |
| PF13961                | DUF4219         | Domain of unknown function (DUF4219)                      |
| PF13966                | zf-RVT          | zinc-binding in reverse transcriptase                     |
| PF13968                | DUF4220         | Domain of unknown function (DUF4220)                      |
| PF13976                | gag_pre-integr  | GAG-pre-integrase domain                                  |
| PF14111                | DUF4283         | Domain of unknown function (DUF4283)                      |
| PF14223                | Retrotran_gag_2 | gag-polypeptide of LTR copia-type                         |
| PF14244                | Retrotran_gag_3 | gag-polypeptide of LTR copia-type                         |
| PF14372                | DUF4413         | Domain of unknown function (DUF4413)                      |
| PF14392                | zf-CCHC_4       | Zinc knuckle                                              |
| PF14624                | Vwaint          | VWA / Hh protein intein-like                              |
| PF14683                | CBM-like        | Polysaccharide lyase family 4, domain III                 |
| PF16561                | AMPK1_CBM       | Glycogen recognition site of AMP-activated protein kinase |
| PF17123                | zf-RING_11      | RING-like zinc finger                                     |

45

46

47 **Supplementary Table 7. Repeat sequences in the black pepper genome assembly.**

|                 |                       | <b>number of elements*</b> | <b>length of occupied</b> | <b>percentage of sequence</b> |
|-----------------|-----------------------|----------------------------|---------------------------|-------------------------------|
| SINEs:          |                       | 104                        | 16,555                    | 0                             |
| LINES:          |                       | 17,482                     | 12,505,878                | 1.64                          |
|                 | LINE1                 | 9,168                      | 7,756,560                 | 1.02                          |
|                 | LINE2                 | 63                         | 111,025                   | 0.01                          |
|                 | L3/CR1                | 0                          | 0                         | 0                             |
|                 | RTE                   | 1,224                      | 738,343                   | 0.1                           |
| LTR elements:   |                       | 32,3397                    | 282,982,505               | 37.17                         |
|                 | Caulimovirus          | 2,832                      | 3,081,483                 | 0.4                           |
|                 | Copia                 | 92,691                     | 69,684,226                | 9.15                          |
|                 | Gypsy                 | 201,723                    | 193,127,498               | 25.37                         |
|                 | Pao                   | 1,390                      | 581,281                   | 0.08                          |
|                 | DIRS                  | 185                        | 110,255                   | 0.01                          |
|                 | Retro                 | 4,001                      | 2,284,508                 | 0.3                           |
|                 | BEL                   | 579                        | 458,550                   | 0.06                          |
| DNA elements:   |                       | 165,462                    | 78,653,714                | 10.33                         |
|                 | Academ                | 192                        | 83,366                    | 0.01                          |
|                 | Crypton               | 222                        | 250,542                   | 0.03                          |
|                 | Dada                  | 333                        | 146,366                   | 0.02                          |
|                 | EnSpm/CACT A          | 10,804                     | 4,699,167                 | 0.62                          |
|                 | Ginger                | 546                        | 179,169                   | 0.02                          |
|                 | Harbinger             | 2,613                      | 1,108,579                 | 0.15                          |
|                 | hAT                   | 15,231                     | 7,703,783                 | 1.01                          |
|                 | Helitron              | 4,460                      | 1,835,765                 | 0.24                          |
|                 | ISL2EU                | 133                        | 31,261                    | 0                             |
|                 | Kolobok               | 487                        | 300,690                   | 0.04                          |
|                 | Mariner               | 130                        | 94,128                    | 0.01                          |
|                 | MITEs                 | 44,040                     | 14,775,143                | 1.94                          |
|                 | MuDR                  | 40,737                     | 27,926,964                | 3.67                          |
|                 | Novosib               | 82                         | 44,603                    | 0.01                          |
|                 | P                     | 19                         | 8,005                     | 0                             |
|                 | Polinton              | 3,249                      | 1,634,254                 | 0.21                          |
|                 | Sola                  | 941                        | 275,878                   | 0.04                          |
|                 | Transib               | 96                         | 32,166                    | 0                             |
| Unclassified:   |                       | 50,072                     | 30,202,270                | 3.97                          |
| Total           | interspersed repeats: |                            | 404,360,922               | 53.12                         |
| Simple repeats: |                       | 214,761                    | 10,432,062                | 1.37                          |
| Low complexity: |                       | 31,635                     | 1,712,306                 | 0.22                          |



48 **Supplementary Table 8.** The percentage of transposable elements in study species.

| <b>Species</b>                    | <b>NonLTR(%)</b> | <b>LTR (%)</b> | <b>DNA (%)</b> |
|-----------------------------------|------------------|----------------|----------------|
| <i>Physcomitrella patens</i>      | 0.27             | 98.62          | 1.11           |
| <i>Selaginella moellendorffii</i> | 12.08            | 64.76          | 23.16          |
| <i>Amborella trichopoda</i>       | 11.76            | 67.42          | 20.81          |
| <i>Piper nigrum</i>               | 3.37             | 75.08          | 21.54          |
| <i>Cinnamomum kanehirae</i>       | 10.33            | 71.75          | 17.92          |
| <i>Liriodendron chinense</i>      | 3.38             | 90.99          | 5.63           |
| <i>Oryza sativa</i>               | 6.18             | 59.45          | 34.37          |
| <i>Dendrobium officinale</i>      | 20.81            | 67.28          | 11.90          |
| <i>Ananas comosus</i>             | 13.27            | 58.91          | 27.82          |
| <i>Arabidopsis thaliana</i>       | 12.33            | 46.19          | 41.48          |
| <i>Camellia sinensis</i>          | 4.84             | 84.55          | 10.61          |
| <i>Capsicum annuum</i>            | 2.20             | 91.63          | 6.17           |
| <i>Citrus sinensis</i>            | 13.40            | 65.64          | 20.95          |
| <i>Coffea canephora</i>           | 8.49             | 73.80          | 17.71          |
| <i>Macleaya cordata</i>           | 16.50            | 61.66          | 21.84          |
| <i>Nelumbo nucifera</i>           | 14.00            | 83.87          | 2.13           |
| <i>Papaver somniferum</i>         | 10.69            | 79.67          | 9.63           |
| <i>Vitis vinifera</i>             | 13.50            | 71.12          | 15.38          |

49 **Supplementary Table 9. The percentage of all type transposable elements in assembled genomes and ratio of Gypsy-to-Copia.**

| Species                           | LINE (%) | SINE (%)   | NonLTR (%) | LTR/Gypsy (%) | LTR/Copia (%) | LTR (%) | MITEs (%) | Helitron (%) | DNA (%) | Gypsy/Copia |
|-----------------------------------|----------|------------|------------|---------------|---------------|---------|-----------|--------------|---------|-------------|
| <i>Physcomitrella patens</i>      | 0.238882 | 0.00589554 | 0.269466   | 91.9287       | 6.59107       | 98.6216 | 0.564275  | 0.263793     | 1.10892 | 13.9475     |
| <i>Selaginella moellendorffii</i> | 10.8795  | 0.395128   | 12.0779    | 55.9411       | 3.61446       | 64.7625 | 1.28266   | 4.5696       | 23.1596 | 15.477      |
| <i>Amborella trichopoda</i>       | 10.5821  | 1.10639    | 11.7641    | 48.1081       | 13.232        | 67.4246 | 0.0222665 | 0.157294     | 20.8113 | 3.63575     |
| <i>Cinnamomum kanehirae</i>       | 8.32663  | 0.701993   | 10.328     | 39.2482       | 25.6013       | 71.7535 | 0.0075476 | 1.06792      | 17.9185 | 1.53306     |
| <i>Liriodendron chinense</i>      | 2.41906  | 0.627161   | 3.37903    | 71.2597       | 19.4845       | 90.9897 | 0.200547  | 0.452443     | 5.63122 | 3.65725     |
| <i>Piper nigrum</i>               | 3.35176  | 0.00480597 | 3.37357    | 51.161        | 18.4139       | 75.0817 | 4.00207   | 0.497767     | 21.5447 | 2.77839     |
| <i>Ananas comosus</i>             | 10.265   | 2.07262    | 13.2687    | 36.772        | 14.0795       | 58.909  | 0.0104698 | 0.481715     | 27.8224 | 2.61174     |
| <i>Oryza sativa</i>               | 5.97437  | 0.207163   | 6.18177    | 46.6105       | 10.5182       | 59.4471 | 13.009    | 3.44184      | 34.3712 | 4.43139     |
| <i>Dendrobium officinale</i>      | 19.5517  | 0.545021   | 20.814     | 19.9458       | 45.2208       | 67.284  | 0.0111522 | 0.880335     | 11.902  | 0.441076    |
| <i>Arabidopsis thaliana</i>       | 11.3343  | 0.815834   | 12.3345    | 33.0149       | 9.7523        | 46.1852 | 17.2949   | 5.37808      | 41.4802 | 3.38534     |
| <i>Camellia sinensis</i>          | 3.96202  | 0.14366    | 4.84041    | 68.84         | 13.1092       | 84.5464 | 0.736759  | 0.275014     | 10.6132 | 5.25127     |
| <i>Capsicum annuum</i>            | 2.1154   | 0.0424391  | 2.20363    | 81.5558       | 8.47787       | 91.6269 | 1.05834   | 0.11994      | 6.16945 | 9.61984     |
| <i>Citrus sinensis</i>            | 11.3003  | 1.31054    | 13.4011    | 27.4413       | 27.337        | 65.6445 | 5.38481   | 0.738124     | 20.9544 | 1.00381     |
| <i>Coffea canephora</i>           | 7.25349  | 0.168594   | 8.49411    | 57.3656       | 13.8002       | 73.7984 | 5.72844   | 1.55791      | 17.7075 | 4.15688     |
| <i>Macleaya cordata</i>           | 11.9969  | 1.16828    | 16.4988    | 29.096        | 26.8851       | 61.6563 | 0.0511814 | 1.14564      | 21.8448 | 1.08223     |
| <i>Nelumbo nucifera</i>           | 9.29088  | 4.70321    | 13.9987    | 35.8935       | 47.8121       | 83.8698 | 0.0249146 | 0.195305     | 2.13143 | 0.75072     |
| <i>Vitis vinifera</i>             | 12.4714  | 0.267305   | 13.4965    | 37.2871       | 30.7614       | 71.1203 | 0.0138565 | 0.351128     | 15.3832 | 1.21214     |
| <i>Papaver somniferum</i>         | 9.46844  | 0.0004104  | 10.6937    | 45.3976       | 32.6018       | 79.6733 | 0.0923317 | 0.323755     | 9.63301 | 1.39249     |

50 **Supplementary Table 10. Statistics of synteny analysis for *Amborella trichopoda* and black pepper genome.**

| <b>Genome and Annotation Statistics</b> |                |                 |                  |                  |                  |                   |                   |                  |                 |                 |
|-----------------------------------------|----------------|-----------------|------------------|------------------|------------------|-------------------|-------------------|------------------|-----------------|-----------------|
| <b>Species</b>                          | <b>Seqs</b>    | <b>Total Kb</b> | <b>genes</b>     | <b>genes (%)</b> | <b>Max Kb</b>    | <b>Min Kb</b>     | <b>&lt; 100Kb</b> | <b>100Kb-1Mb</b> | <b>1Mb-10Mb</b> | <b>&gt;10Mb</b> |
| <i>Amborella trichopoda</i>             | 245            | 675897          | 53796            | 44%              | 15980            | 101               | 0                 | 86               | 0               | 4               |
| <i>Piper nigrum</i>                     | 26             | 760437          | 63427            | 23%              | 48451            | 14906             | 0                 | 0                | 0               | 26              |
| <b>Anchor Statistics</b>                |                |                 |                  |                  |                  |                   |                   |                  |                 |                 |
| <b>Species</b>                          | <b>Anchors</b> | <b>InBlocks</b> | <b>Annotated</b> | <b>Coverage</b>  | <b>&lt;100bp</b> | <b>100bp-1Kb</b>  | <b>1Kb-10Kb</b>   | <b>&gt;10Kb</b>  |                 |                 |
| <i>Amborella trichopoda</i>             | 22847          | 19%             | 78%              | 8%               | 598              | 11881             | 8276              | 2092             |                 |                 |
| <i>Piper nigrum</i>                     | 22847          | 19%             | 72%              | 5%               | 649              | 12760             | 9243              | 195              |                 |                 |
| <b>Block Statistics</b>                 |                |                 |                  |                  |                  |                   |                   |                  |                 |                 |
| <b>Species</b>                          | <b>Blocks</b>  | <b>Coverage</b> | <b>DoubleCov</b> | <b>Inverted</b>  | <b>GenesHit</b>  | <b>&lt; 100Kb</b> | <b>100Kb-1Mb</b>  | <b>1Mb-10Mb</b>  | <b>&gt;10Mb</b> |                 |
| <i>Amborella trichopoda</i>             | 316            | 40%             | 31%              | 139              | 9                | 0                 | 34                | 282              | 0               |                 |
| <i>Piper nigrum</i>                     | 316            | 34%             | 10%              | 139              | 8                | 17                | 197               | 101              | 1               |                 |

## 51 Supplementary References

- 52 1 Marçais, G. & Kingsford, C. A fast, lock-free approach for efficient parallel  
53 counting of occurrences of k-mers. *Bioinformatics* **27**, 764 (2011).
- 54 2 Liu, B. *et al.* Estimation of genomic characteristics by analyzing k-mer frequency  
55 in de novo genome projects. *Quantitative Biology* **35**, 62-67 (2013).
- 56 3 Quinlan, A. R. & Hall, I. M. BEDTools: a flexible suite of utilities for comparing  
57 genomic features. *Bioinformatics* **26**, 841 (2010).
- 58 4 Quinlan, A. R. BEDTools: the Swiss-army tool for genome feature analysis.  
59 *Current protocols in bioinformatics* **47**, 11.12. 11-11.12. 34 (2014).
- 60 5 Li, H. Aligning sequence reads, clone sequences and assembly contigs with BWA-  
61 MEM. **1303** (2013).
- 62 6 Li, H. *et al.* The Sequence Alignment/Map format and SAMtools. *Bioinformatics*  
63 **25**, 2078-2079 (2009).
- 64 7 McKenna, A. *et al.* The Genome Analysis Toolkit: a MapReduce framework for  
65 analyzing next-generation DNA sequencing data. *Genome research* **20**, 1297-1303  
66 (2010).
- 67 8 Gogarten, S. M. *et al.* GWASTools: an R/Bioconductor package for quality control  
68 and analysis of genome-wide association studies. *Bioinformatics* **28**, 3329-3331  
69 (2012).
- 70 9 Finn, R. D. *et al.* The Pfam protein families database: towards a more sustainable  
71 future. *Nucleic Acids Research* **44**, D279-D285 (2016).
- 72 10 Lowe, T. M. & Chan, P. P. tRNAscan-SE On-line: integrating search and context  
73 for analysis of transfer RNA genes. *Nucleic Acids Research* **44**, W54-W57 (2016).
- 74 11 Lagesen, K. *et al.* RNAmmer: consistent and rapid annotation of ribosomal RNA  
75 genes. *Nucleic Acids Research* **35**, 3100-3108 (2007).
- 76 12 Li, A., Zhang, J. & Zhou, Z. PLEK: a tool for predicting long non-coding RNAs  
77 and messenger RNAs based on an improved k-mer scheme. *BMC Bioinformatics* **15**,  
78 311 (2014).
- 79 13 Singh, U., Khemka, N., Rajkumar, M. S., Garg, R. & Jain, M. PLncPRO for  
80 prediction of long non-coding RNAs (lncRNAs) in plants and its application for  
81 discovery of abiotic stress-responsive lncRNAs in rice and chickpea. *Nucleic acids  
82 research* **45**, e183-e183 (2017).
- 83 14 Nawrocki, E. P. *et al.* Rfam 12.0: updates to the RNA families database. *Nucleic  
84 Acids Research* **43**, D130 (2015).
- 85 15 Nawrocki, E. P. & Eddy, S. R. Infernal 1.1: 100-fold faster RNA homology  
86 searches. *Bioinformatics* **29**, 2933-2935, doi:10.1093/bioinformatics/btt509 (2013).
- 87 16 Lyons, E. & Freeling, M. How to usefully compare homologous plant genes and  
88 chromosomes as DNA sequences. *The Plant Journal* **53**, 661-673 (2010).
- 89 17 Wang, D., Zhang, Y., Zhang, Z., Zhu, J. & Yu, J. KaKs\_Calculator 2.0: A Toolkit  
90 Incorporating Gamma-Series Methods and Sliding Window Strategies. *Genomics  
91 Proteomics Bioinformatics* **8**, 77-80 (2010).
- 92 18 Wang, Y. *et al.* MCSanX: a toolkit for detection and evolutionary analysis of gene  
93 synteny and collinearity. *Nucleic acids research* **40**, e49-e49 (2012).

94 19 Guo, L. *et al.* The opium poppy genome and morphinan production. *Science* **362**,  
95 343-347 (2018).

96 20 Wood, A. B., Barrow, M. L. & James, D. J. Piperine determination in pepper (*Piper*  
97 *nigrum* L.) and its oleoresins-a reversed-phase high-performance liquid  
98 chromatographic method. *Flavour & Fragrance Journal* **3**, 55-64 (2010).

99 21 Andrews, S. FastQC: a quality control tool for high throughput sequence data.  
100 (2010).

101 22 Ewels, P., Magnusson, M., Lundin, S. & Källér, M. MultiQC: summarize analysis  
102 results for multiple tools and samples in a single report. *Bioinformatics* **32**, 3047-  
103 3048 (2016).

104 23 Kolde, R. & Kolde, M. R. Package ‘pheatmap’. (2018).

105 24 Krzywinski, M. *et al.* Circos: an information aesthetic for comparative genomics.  
106 *Genome research* **19**, 1639-1645 (2009).

107 25 Gel, B. & Serra, E. karyoploteR: an R/Bioconductor package to plot customizable  
108 genomes displaying arbitrary data. *Bioinformatics* **33**, 3088-3090 (2017).

109 26 Love, M. I., Huber, W. & Anders, S. Moderated estimation of fold change and  
110 dispersion for RNA-seq data with DESeq2. *Genome Biology* **15**, 550 (2014).

111 27 Ignatiadis, N., Klaus, B., Zaugg, J. B. & Huber, W. Data-driven hypothesis  
112 weighting increases detection power in genome-scale multiple testing. *Nature*  
113 *methods* **13**, 577 (2016).

114 28 Shannon, P. *et al.* Cytoscape: a software environment for integrated models of  
115 biomolecular interaction networks. *Genome research* **13**, 2498-2504 (2003).

116 29 Bader, G. D. & Hogue, C. W. V. An automated method for finding molecular  
117 complexes in large protein interaction networks. *BMC bioinformatics* **4**, 2-2,  
118 doi:10.1186/1471-2105-4-2 (2003).

119 30 Denoeud, F. *et al.* The coffee genome provides insight into the convergent  
120 evolution of caffeine biosynthesis. *Science* **345**, 1181-1184 (2014).

121 31 Kim, S. *et al.* Genome sequence of the hot pepper provides insights into the  
122 evolution of pungency in *Capsicum* species. *Nature Genetics* **46**, 270-278 (2014).

123 32 Wei, C. *et al.* Draft genome sequence of *Camellia sinensis* var. *sinensis* provides  
124 insights into the evolution of the tea genome and tea quality. *Proc Natl Acad Sci U*  
125 *S A* **115**, 201719622 (2018).

126 33 Jaillon, O. *et al.* The grapevine genome sequence suggests ancestral  
127 hexaploidization in major angiosperm phyla. *Nature* **449**, 463 (2007).

128 34 Xu, Q. *et al.* The draft genome of sweet orange (*Citrus sinensis*). *Nature Genetics*  
129 **45**, 59-66, doi:10.1038/ng.2472 (2012).

130 35 Gui, S. *et al.* Improving *Nelumbo nucifera* genome assemblies using high-  
131 resolution genetic maps and BioNano genome mapping reveals ancient  
132 chromosome rearrangements. *Plant Journal for Cell & Molecular Biology* (2018).

133 36 Liu, X. *et al.* The genome of medicinal plant *Macleaya cordata* provides new  
134 insights into benzyloisoquinoline alkaloids metabolism. *Molecular plant* **10**, 975-989  
135 (2017).

136 37 The Arabidopsis Genome Initiative. Analysis of the genome sequence of the  
137 flowering plant *Arabidopsis thaliana*. *Nature* **408**, 796-815, doi:10.1038/35048692  
138 (2000).

- 139 38 Goff, S. A. *et al.* A draft sequence of the rice genome (*Oryza sativa* L. ssp.  
140 japonica). *Science* **296**, 92-100 (2002).
- 141 39 Ming, R. *et al.* The pineapple genome and the evolution of CAM photosynthesis.  
142 *Nature Genetics* **47**, 1435-1442 (2015).
- 143 40 Liang, Y. *et al.* The genome of *Dendrobium officinale* illuminates the biology of  
144 the important traditional Chinese orchid herb. *Molecular Plant* **8**, 922-934 (2015).
- 145 41 Chen, J. *et al.* Liriodendron genome sheds light on angiosperm phylogeny and  
146 species-pair differentiation. *Nature Plants* **5**, 18-25, doi:10.1038/s41477-018-0323-  
147 6 (2019).
- 148 42 Chaw, S.-M. *et al.* Stout camphor tree genome fills gaps in understanding of  
149 flowering plant genome evolution. *Nature Plants* **5**, 63-73, doi:10.1038/s41477-  
150 018-0337-0 (2019).
- 151 43 Ibarra-Laclette, E. *et al.* Deep sequencing of the Mexican avocado transcriptome,  
152 an ancient angiosperm with a high content of fatty acids. *BMC Genomics* **16**, 599,  
153 doi:10.1186/s12864-015-1775-y (2015).
- 154 44 Albert, V. A. *et al.* The Amborella genome and the evolution of flowering plants.  
155 *Science* **342**, 1241089 (2013).
- 156 45 Wan, T. *et al.* A genome for gnetophytes and early evolution of seed plants. *Nature*  
157 *Plants* **4**, 82-89, doi:10.1038/s41477-017-0097-2 (2018).
- 158 46 Nystedt, B. *et al.* The Norway spruce genome sequence and conifer genome  
159 evolution. *Nature* **497**, 579-584, doi:10.1038/nature12211 (2013).
- 160 47 Banks, J. A. *et al.* The Selaginella genome identifies genetic changes associated  
161 with the evolution of vascular plants. *Science* **332**, 960-963,  
162 doi:10.1126/science.1203810 (2011).
- 163 48 Rensing, S. A. *et al.* The Physcomitrella genome reveals evolutionary insights into  
164 the conquest of land by plants. *Science* **319**, 64-69 (2008).
- 165 49 Li, L., Jr, S. C. & Roos, D. S. OrthoMCL: identification of ortholog groups for  
166 eukaryotic genomes. *Genome Research* **13**, 2178-2189 (2003).
- 167 50 De Bie, T., Cristianini, N., Demuth, J. P. & Hahn, M. W. CAFE: A computational  
168 tool for the study of gene family evolution. *Bioinformatics* **22**, 1269-1271 (2006).
- 169 51 Cummings, M. P. *HyPhy (Hypothesis Testing Using Phylogenies)*. (John Wiley &  
170 Sons, Ltd, 2014).
- 171 52 Delport, W., Poon, A. F., Frost, S. D. & Kosakovsky Pond, S. L. Datamonkey 2010:  
172 a suite of phylogenetic analysis tools for evolutionary biology. *Bioinformatics* **26**,  
173 2455-2457 (2010).
- 174 53 Kosakovsky Pond, S. L., Posada, D., Gravenor, M. B., Woelk, C. H. & Frost, S. D.  
175 GARD: a genetic algorithm for recombination detection. *Bioinformatics* **22**, 3096  
176 (2006).
- 177 54 Kosakovsky Pond, S. L. & Frost, S. D. Not so different after all: a comparison of  
178 methods for detecting amino acid sites under selection. *Molecular Biology &*  
179 *Evolution* **22**, 1208 (2005).
- 180 55 Murrell, B. *et al.* Detecting individual sites subject to episodic diversifying  
181 selection. *PLoS genetics* **8**, e1002764 (2012).

182
